1 **Gene fitness landscape of group A streptococcus**  
2 **during necrotizing myositis**

3

4 **Luchang Zhu,<sup>1\*</sup> Randall J. Olsen,<sup>1,2\*</sup> Stephen B. Beres,<sup>1</sup> Jesus M. Eraso,<sup>1</sup>**  
5 **Matthew Ojeda Saavedra,<sup>1</sup> Samantha L. Kubiak,<sup>1</sup> Concepcion C. Cantu,<sup>1</sup>**  
6 **Leslie Jenkins,<sup>3</sup> Amelia R. L. Charbonneau,<sup>4,5</sup> Andrew S. Waller,<sup>4</sup> and**  
7 **James M. Musser<sup>1,2§</sup>**

8

9 <sup>1</sup>Center for Molecular and Translational Human Infectious Diseases Research,  
10 Houston Methodist Research Institute, and Department of Pathology and  
11 Genomic Medicine, Houston Methodist Hospital, Houston, Texas,  
12 USA. <sup>2</sup>Department of Pathology and Laboratory Medicine, Weill Medical College  
13 of Cornell University, New York, New York, USA. <sup>3</sup>Department of Comparative  
14 Medicine, Houston Methodist Research Institute, Houston, Texas, USA. <sup>4</sup>Animal  
15 Health Trust, Lanwades Park, Newmarket, Suffolk, United Kingdom. <sup>5</sup>Department  
16 of Veterinary Medicine, University of Cambridge, Cambridge, United Kingdom.

17

18

19 \*Luchang Zhu and Randall J. Olsen contributed equally to this work.

20

21 §Address correspondence to James M. Musser, M.D., Ph.D., Department of  
22 Pathology and Genomic Medicine, Houston Methodist Research Institute,  
23 Houston, TX 77030. E-mail: [jmmusser@houstonmethodist.org](mailto:jmmusser@houstonmethodist.org)

24 [ABSTRACT]

25 **Necrotizing fasciitis and myositis are devastating infections characterized**  
26 **by high mortality. Group A streptococcus (GAS) is a common cause of**  
27 **these infections, but the molecular pathogenesis is poorly understood. We**  
28 **report a genome-wide analysis using serotype M1 and M28 strains that**  
29 **identified novel GAS genes contributing to necrotizing myositis in**  
30 **nonhuman primates (NHP), a clinically relevant model. Using transposon**  
31 **directed insertion-site sequencing (TraDIS) we identified 126 and 116 GAS**  
32 **genes required for infection by serotype M1 and M28 organisms,**  
33 **respectively. For both M1 and M28 strains, more than 25% of the GAS**  
34 **genes required for necrotizing myositis encode known or putative**  
35 **transporters. Thirteen GAS transporters contributed to both M1 and M28**  
36 **strain fitness in NHP myositis, including putative importers for amino**  
37 **acids, carbohydrates, and vitamins, and exporters for toxins, quorum**  
38 **sensing peptides, and uncharacterized molecules. Targeted deletion of**  
39 **genes encoding five transporters confirmed that each isogenic mutant**  
40 **strain was significantly impaired in causing necrotizing myositis in NHPs.**  
41 **qRT-PCR analysis showed that these five genes are expressed in infected**  
42 **NHP and human skeletal muscle. Certain substrate-binding lipoproteins of**  
43 **these transporters, such as Spy0271 and Spy1728, were previously**  
44 **documented to be surface-exposed, suggesting that our findings have**  
45 **translational research implications.**

46

## 47 **Introduction**

48 Necrotizing fasciitis, commonly known as the “flesh-eating disease”, is an  
49 invasive infection with very high rates of human morbidity and mortality (1, 2). In  
50 severe cases, contiguous muscle may be severely damaged, resulting in  
51 necrotizing myositis. Based on whether the cause is polymicrobial or  
52 monomicrobial, necrotizing fasciitis can be divided into type I (polymicrobial) and  
53 type II (monomicrobial) (2, 3). Group A streptococcus (GAS) is the primary cause  
54 of type II necrotizing fasciitis, and has an average case fatality rate of 29% (2, 4,  
55 5). The molecular pathogenesis processes at work in GAS necrotizing fasciitis  
56 and myositis are poorly understood, a lack of knowledge that has impeded  
57 development of new effective diagnostics and therapeutics.

58       GAS is a human-specific pathogen causing more than 700 million  
59 infections annually worldwide (6). GAS infections range from relatively benign  
60 pharyngitis, skin, and soft-tissue infections, to life-threatening invasive diseases  
61 such as necrotizing fasciitis and necrotizing myositis (1, 7). No vaccine is  
62 currently available to prevent GAS infections. Decades of research have  
63 revealed some of the GAS molecules that contribute to the pathogenesis of  
64 necrotizing fasciitis and myositis, including M protein (8, 9), extracellular cysteine  
65 protease streptococcal pyrogenic exotoxin B (SpeB) (10-13), hyaluronic acid  
66 capsule (14), and cytotoxins NADase and streptolysin O (15-21). However,  
67 although the genome of GAS is relatively small (~1,800 genes) (22, 23), current  
68 understanding of the molecular pathogenesis of GAS necrotizing fasciitis and  
69 myositis is limited.

70 High-throughput genome-wide screens based on transposon mutagenesis  
71 strategies are very useful in providing new information about the genetic basis of  
72 bacterial virulence. Technologies such as signature-tagged mutagenesis (STM),  
73 transposon site hybridization (TraSH), and Tn-seq have been applied  
74 successfully to many bacterial pathogens to identify genes required for fitness  
75 under diverse *in vivo* and *ex vivo* conditions (24-30). In GAS, genome-wide  
76 transposon mutagenesis screens have been used to identify genes contributing  
77 to fitness during growth in human blood *ex vivo*, human saliva *ex vivo*, and  
78 mouse subcutaneous infections (24, 30-32). However, a genome-wide  
79 investigation of the GAS genes contributing to fitness in necrotizing myositis has  
80 not been undertaken.

81 Analysis of the molecular pathogenesis of GAS necrotizing myositis  
82 requires use of appropriate animal models. Toward this end, mouse and  
83 nonhuman primate (NHP) necrotizing myositis models have been developed that  
84 approximate this disease (10, 33, 34). Importantly, GAS is a human-specific  
85 pathogen. Some GAS virulence factors are specific for human and NHP target  
86 molecules (35-38) and have significantly decreased or no activity against the  
87 mouse homologs (38-40). Thus, NHP necrotizing myositis provides the most  
88 relevant experimental model possible.

89 Here we report the first use in NHPs of a relatively new genome-wide  
90 transposon mutagenesis technique termed transposon directed insertion-site  
91 sequencing (TraDIS) (41, 42). TraDIS was recently documented to provide much  
92 novel information about GAS genes contributing to fitness in human saliva (31).

93 Using highly saturated transposon mutant libraries made in two genetically  
94 distinct GAS strains that are common causes of severe human infections, we  
95 identified novel genes required for bacterial fitness during necrotizing myositis.  
96 Our screen revealed the theme that GAS transporters play a pivotal role in this  
97 infection. We confirmed and extended the TraDIS screen data using isogenic  
98 mutant strains, *in vitro* growth phenotyping and qRT-PCR analysis of necrotic  
99 myositis tissues taken from infected NHPs and human patients.

100

101

## 102 **Results**

103 *Construction of highly saturated transposon mutant libraries in genetically*  
104 *representative strains of serotype M1 and M28 of GAS.* Transposon insertion  
105 mutant libraries were generated using serotype M1 strain MGAS2221 and  
106 serotype M28 strain MGAS27961 as the parental organisms. Strains of these two  
107 M protein serotypes were used because they are among the five more abundant  
108 M protein types causing invasive infections in many countries, and in some cases  
109 they are the dominant causes of infections. Thus, serotype M1 and M28 GAS are  
110 clinically highly relevant (43-46). These two strains were chosen for transposon  
111 mutagenesis because (i) strain MGAS2221 is genetically representative of a  
112 pandemic serotype M1 clone that arose in the 1980s, rapidly spread worldwide  
113 and currently is the most prevalent cause of severe infections globally (18, 20,  
114 47), (ii) strain MGAS27961 is genetically representative of a virulent serotype  
115 M28 clone that is prevalent in the United States and elsewhere (48), (iii) both

116 strains have wild-type alleles of all major transcriptional regulators that are known  
117 to affect GAS virulence, such as *covR* and *covS*, *ropB*, *mga*, and *rocA*, and (iv)  
118 both strains have been used previously in animal infection studies (18, 20, 33).  
119 Using transposon plasmid pGh9:ISS1 (49), we generated dense transposon  
120 mutant libraries in strains MGAS2221 and MGAS27961 containing 154,666 (an  
121 insertion every 12 bp on average) and 330,477 (an insertion every 5.5 bp on  
122 average) unique transposon insertions, respectively (Figure 1A). This means  
123 that on average, the serotype M1 and M28 libraries had 66 and 139 insertions  
124 per open reading frame. The insertion index (number of unique insertions/size of  
125 the gene) of each of the genes in the M1 and M28 genomes is illustrated in  
126 Figure 1B. Use of the MGAS2221 transposon mutant library to identify novel  
127 genes contributing to GAS fitness in human saliva *ex vivo* has been described  
128 recently (31).

129 *Genome-wide screens identify GAS genes contributing to fitness in a*  
130 *necrotizing myositis infection model in cynomolgus macaques.* We screened the  
131 M1 and M28 GAS transposon mutant libraries in NHPs as a first step toward  
132 discovering genes contributing to fitness during necrotizing myositis. Six  
133 cynomolgus macaques each were inoculated by intramuscular injection with  
134 either the M1 or M28 transposon mutant libraries and followed for 24 h. All  
135 animals developed signs and symptoms consistent with necrotizing myositis and  
136 were necropsied. Biopsies containing necrotic muscle were obtained from the  
137 inoculation site to recover output mutant pools for subsequent analysis.

138 Quantitative culture yielded an average of  $4.87 \times 10^8$  CFU/g for M1, and  $8.77 \times$   
139  $10^8$  for M28 in the tissue biopsy specimens used for TraDIS analysis.

140 TraDIS was used to compare the mutant compositions of the input and  
141 output pools. The TraDIS analysis identified genes with significantly altered  
142 mutant frequency in the output mutant pools relative to the input mutant pool  
143 (examples shown in Figure S1). Infection bottlenecks can be a technical  
144 challenge for high-throughput transposon mutagenesis studies, and substantial  
145 loss of mutant library complexity during animal infection can result in erroneous  
146 identification of fitness genes (50). Our TraDIS results showed that for both M1  
147 and M28 GAS screens, there was no substantial decline of mutant library  
148 complexity post NHP infections (Figure 2A,B). On average, 67% and 84% of the  
149 library complexity remain in the M1 and M28 output pools, respectively (Figure  
150 2A,B). This high diversity of transposition site mutants recovered is inconsistent  
151 with a narrow infection bottleneck and indicates that our screens are unlikely to  
152 erroneously identify fitness genes. To identify GAS fitness genes in the infected  
153 NHP skeletal muscle milieu, genes previously identified as essential for GAS  
154 growth *in vitro* in rich medium (THY) were excluded from the analysis as is  
155 commonly done (51). Disrupted genes associated with significantly decreased  
156 fitness (transposon frequency log<sub>2</sub> fold-change < -1, and *q* value < 0.01) in the  
157 output mutant pools were interpreted as contributing to NHP necrotizing myositis  
158 (Figure 2C,D, Figure 3). We identified 126 and 116 genes in the serotype M1 and  
159 M28 strains, respectively, that are crucial for GAS fitness in this infection model  
160 (Figure 3A). That is, inactivating these genes potentially confers diminished GAS

161 fitness in necrotizing myositis. Importantly, a common set of 72 genes was  
162 identified as crucial for fitness in both the serotype M1 and M28 library NHP  
163 screens (Figure 3A, Table S1). The shared 72 genes represent 57% of the  
164 serotype M1 fitness genes and 65% of the serotype M28 fitness genes (Figure  
165 3A). Functional categorization of the fitness genes found that numerically, the  
166 more prevalent GOG categories included genes inferred to be involved in amino  
167 acid transport and metabolism (E), inorganic ion transport and metabolism (P),  
168 and transcription (K) (Figure 3C). Genes encoding many documented virulence  
169 factors or virulence modulating factors were identified as contributing to fitness in  
170 both serotype M1 and M28 GAS strains, including *adcB/C* (52, 53), *gacI* (54, 55),  
171 *pepO* (56, 57), *inlA* (58), *perR* (59) and *scfAB* (32) (Table S1, Table S2, Table  
172 S4).

173 We also identified 21 and 20 genes in the serotype M1 and M28 strains,  
174 respectively, that are associated with significantly increased fitness *in vivo*  
175 (transposon insertion frequency log<sub>2</sub> fold-change > 1, and q value < 0.01) (Figure  
176 2, Figure 3B and 3D). That is, inactivating these genes potentially confers  
177 enhanced GAS fitness during NHP necrotizing myositis. These genes include  
178 known negative regulators of virulence *rivR* (60) and *rocA* (61-65). Of note, *rocA*  
179 and *ppiB* (peptidyl-prolyl cis-trans isomerase) were identified in both the serotype  
180 M1 and M28 strains (Figure 3B, Table S3, Table S5). Inactivation of the *rocA*  
181 gene in an M28 GAS strain was recently shown to significantly increase virulence  
182 in a mouse model of necrotizing myositis (66).



183 To investigate the phylogenetic distribution of the identified *in vivo* fitness  
184 genes among diverse GAS strains, we examined the presence of M1 and M28  
185 fitness genes required during NHP necrotizing myositis in 62 sequenced GAS  
186 genomes representing 26 different M protein serotypes (Table S6). The vast  
187 majority of the M1 fitness genes (96%) and M28 fitness genes (93%) are present  
188 in at least 61 of the 62 GAS strains (Figure 3, E and F).

189 *Comparison of the genetic requirement for necrotizing myositis and those*  
190 *for GAS fitness in human saliva and blood ex vivo, and mouse subcutaneous*  
191 *infections.* Previous genome-wide transposon mutagenesis studies identified  
192 GAS genes required for growth in animal infection models and *ex vivo* in human  
193 body fluids such as blood and saliva (30-32). These published data allowed us to  
194 test the hypothesis that the GAS gene requirements for NHP necrotizing myositis  
195 are distinct from those identified by transposon screens performed in other model  
196 infection environments. That is, we were able to assess the extent to which GAS  
197 has infection-specific genetic programs. We recently reported that 92 serotype  
198 M1 genes were required for optimal growth *ex vivo* in human saliva (31). Only 19  
199 (21% of 92) genes were defined as contributing to serotype M1 fitness in both  
200 human saliva and NHP necrotizing myositis (Figure 4A). These genes include  
201 metabolic genes (*purA*, *purB*, *acoABCL*, *glgP* and *malM*) and transporter genes  
202 (*adcAB*, *braB*, *mtsA*, *mtsB*, *artP*, and *artQ*). The great majority of M1 genes ( $n =$   
203 107, 85%) required in NHP necrotizing myositis did not overlap with fitness  
204 genes required *ex vivo* in human saliva. Using a similar transposon mutagenesis  
205 technique (Tn-seq) 147 genes were identified as contributing to fitness of

206 serotype M1 GAS strain 5448 after subcutaneous inoculation in mice (32). The  
207 overlap between the mouse subcutaneous fitness genes and the 126 necrotizing  
208 myositis genes is relatively larger ( $n = 39$ ) (Figure 4B). These genes include  
209 metabolic genes *purA*, *purB*, *acoABCL*, *glgP*, *malM*, *arcABCD*, and  
210 phosphotransferase system genes *manMLN*. However, 69% of the genes ( $n =$   
211 87) required for NHP necrotizing myositis did not overlap with the genes  
212 identified in the mouse subcutaneous infection study. Using a transposon  
213 mutagenesis technique, McIver and colleagues (30) identified 81 M1 GAS genes  
214 required for optimal bacterial growth in human blood. In comparison with the 126  
215 necrotizing myositis fitness genes, only 14 genes were required in both  
216 conditions (Figure 4C). 89% of the genes ( $n = 112$ ) required for NHP necrotizing  
217 myositis did not overlap with the genes required in human blood *ex vivo*. These  
218 include genes for carbohydrate metabolism (*glgP*, *malM*), transporters (*adcB*,  
219 *braB*, *mtsA*, *mtsB*), and transcriptional regulators (*adcR*, *ciaH*, *ciaR*, *ihk*, *irr*). To  
220 summarize, there is only modest overlap between the GAS genes contributing to  
221 fitness during experimental NHP necrotizing myositis, relative to growth *ex vivo* in  
222 human saliva and blood, and mouse subcutaneous infection. These results are  
223 consistent with our hypothesis that GAS has infection-specific genetic programs.

224 *Genes encoding transporters constitute a considerable portion of GAS*  
225 *fitness determinants in experimental NHP necrotizing myositis.* Bioinformatic  
226 analyses of the identified fitness genes found that regardless of M1 or M28  
227 serotype, more than 25% of the genes contributing to *in vivo* fitness during NHP  
228 necrotizing myositis encode proven or putative transporters (Figure 5A).

229 Specifically, 25.4 % of the serotype M1 fitness genes ( $n = 32$ ) and 29.7% of the  
230 M28 GAS fitness genes ( $n = 32$ ) encode proven or putative transporters (Figure  
231 5A). Importantly, 26 transporter genes are required in both M1 and M28 strains  
232 during infection, indicating that there was considerable overlap between the two  
233 sets of genes (Figure 5B). These 26 shared genes encode 13 distinct  
234 transporters with proven or predicted roles in uptake of nutrients such as amino  
235 acids, metal ions, vitamins, carbohydrate, and export of a variety of substrates.  
236 (Figure 5C). The DNA sequences of the 26 transporter genes are highly  
237 conserved (95% to 100% identity) among genomes for 62 sequenced GAS  
238 strains representing 26 different M protein serotypes (Figure 6). One gene  
239 (*Spy0499*) has less homology in GAS (81% identical in four GAS strains) among  
240 the 62 strains with complete genomes.

241 *Validation of the TraDIS screen results for genes encoding putative amino*  
242 *acid transporters.* Six of the 13 transporters identified to be important for both  
243 serotype M1 and M28 strains during NHP necrotizing myositis are putative amino  
244 acid transporters (Figure 5C, yellow). For example, *Spy0014* is a putative amino  
245 acid permease and *BraB* is a putative branched-chain amino acid transporter.  
246 *Spy0271*, *Spy0272*, and *Spy0273* constitute a putative ABC transporter with  
247 similarity to methionine transporter proteins *MetQ* (65% identical), *MetN* (73%  
248 identical), and *MetP* (71% identical), respectively, of *Streptococcus*  
249 *pneumoniae* (67).

250 To test the hypothesis that *Spy0014*, *BraB*, and *Spy0271-0273* participate  
251 in amino acid transport, we constructed isogenic deletion mutant strains

252  $\Delta$ Spy0014,  $\Delta$ braB, and  $\Delta$ Spy0271-0273 in parental M1 strain MGAS2221. We  
253 studied their growth phenotypes in rich medium (THY broth), and in a peptide-  
254 free chemically defined medium (CDM) (Figure 7). Compared to the wild-type  
255 parental strain, the three isogenic mutant strains do not have a growth defect in  
256 THY medium (Figure 7A). However, the mutant strains had a severe growth  
257 defect when cultured in CDM (Figure 7B), a result consistent with our hypothesis.  
258 As anticipated, the growth defect of these three isogenic mutant strains  
259  $\Delta$ Spy0014,  $\Delta$ braB, and  $\Delta$ Spy0271-0273 was ameliorated by supplementing CDM  
260 with 0.1 g/ml tryptone, a source of abundant peptides (Figure 7C). Together,  
261 these results are consistent with the idea that Spy0014, BraB, and Spy0271-  
262 0273 are amino acid transporters that are essential for GAS growth in the  
263 absence of a source of abundant exogenous peptides.

264         GAS is auxotrophic for 15 amino acids considered essential for growth  
265 (68, 69). We hypothesized that transporters Spy0014, BraB and Spy0271-0273  
266 contribute to uptake of specific essential amino acids. To test this hypothesis, we  
267 supplemented CDM with a high concentration (1 g/L) of each of the highly  
268 soluble essential amino acids to determine if certain amino acids restored the  
269 growth of these transporter mutants via non-specific uptake (Figure 7D-F).  
270 Consistent with the hypothesis, supplementing CDM with methionine restored the  
271 growth of mutant  $\Delta$ Spy0271-0273 to near-wild-type growth phenotype,  
272 suggesting that *Spy0271-0273* encode a methionine transporter (Figure 7E).  
273 Similarly, supplementing CDM with histidine and valine partially restored the  
274 growth of mutant strains  $\Delta$ Spy0014 and  $\Delta$ braB, respectively, suggesting that

275 Spy0014 and BraB contribute to uptake of histidine and valine (Figure 7, D and  
276 F).

277 *Validation of the TraDIS screen results in the NHP model of necrotizing*  
278 *myositis.* To validate the TraDIS screen results *in vivo*, we infected NHPs in the  
279 quadriceps with parental M1 strain MGAS2221, and isogenic mutant strains  
280  $\Delta$ Spy0014,  $\Delta$ braB, and  $\Delta$ Spy0271-0273. Compared to the wild-type parental  
281 strain, each of these three transporter mutant strains caused significantly smaller  
282 lesions characterized by less tissue destruction in the NHP necrotizing myositis  
283 model (Figure 8, A and B). In addition, compared to the wild-type parental strain,  
284 significantly fewer CFUs of each isogenic mutant strain were recovered from the  
285 inoculation site and a distal site of dissemination (Figure 8, C and D).

286 *Virulence role of Spy1726-1728, a poorly characterized ABC transporter.*  
287 Our genome-wide screens identified a putative ABC transporter of unknown  
288 function that is required for NHP infection by the M1 and M28 GAS strains  
289 (Figure 5C, red). This putative transporter is encoded by three contiguous genes:  
290 Spy1726 (transporter permease protein), Spy1727 (ATP-binding protein), and  
291 Spy1728 (substrate-binding lipoprotein). To confirm the virulence role of this  
292 putative transporter, we used isogenic mutant strain  $\Delta$ Spy1726-1728 made by  
293 deleting the entire *Spy1726-1728* region in serotype M1 parental strain  
294 MGAS2221. Consistent with the result from the initial NHP necrotizing myositis  
295 TraDIS screen, isogenic mutant strain  $\Delta$ Spy1726-1728 is significantly attenuated  
296 in capacity to cause necrotizing myositis in NHPs (Figure 8, A - D). This putative  
297 ABC transporter operon was not identified as important for virulence in previous

298 GAS transposon mutagenesis screens (24, 30, 32), suggesting an infection- or  
299 primate-specific role in necrotizing myositis. Of note, Spy1728 (a substrate-  
300 binding lipoprotein) was previously shown to be a GAS surface protein and  
301 potential vaccine candidate (70).

302 *Virulence role of quorum sensing peptide transporter PptAB.* Our genome-  
303 wide TraDIS screens suggest that inactivating the quorum sensing peptide  
304 transporter PptAB in the serotype M1 and M28 strains results in significantly  
305 decreased fitness in NHP necrotizing myositis. To test this finding, we generated  
306 isogenic mutant strain  $\Delta pptAB$  by deleting the *pptAB* genes in serotype M1  
307 parental strain MGAS2221. Relative to the WT parental strain, the  $\Delta pptAB$   
308 mutant strain is significantly attenuated in ability to cause necrotizing myositis in  
309 NHPs (Figure 8, A-D). PptAB has been reported to be required for exporting the  
310 SHP2 and SHP3 quorum sensing peptides (71). However, Rgg2, the  
311 transcriptional regulator that controls expression of the *shp2* and *shp3* genes was  
312 not identified as important for NHP infections in our TraDIS screens. These  
313 results suggest the attenuation of the virulence phenotype in the  $\Delta pptAB$  mutant  
314 strain is likely not associated with the SHP2, SHP3 quorum-sensing pathway in  
315 serotype M1 and M28 strains in this infection model.

316 *Confirmation of the virulence role of glgP, a gene involved in*  
317 *carbohydrate utilization.* Our TraDIS screens identified many GAS genes  
318 implicated in transport of nutrients such as amino acids, vitamins and  
319 carbohydrates. We next studied a gene likely to be involved in carbohydrate  
320 utilization. The GAS gene *glgP* was identified as essential for necrotizing myositis

321 in the TraDIS screens conducted with both the serotype M1 and M28 transposon  
322 mutant libraries (Table S1). However, *glgP* has not previously been implicated in  
323 GAS virulence. *glgP* encodes an inferred protein with homology to *E. coli*  
324 glycogen phosphorylase (72). We generated isogenic mutant strain  $\Delta$ *glgP* by  
325 deleting the *glgP* gene in serotype M1 strain MGAS2221. The  $\Delta$ *glgP* isogenic  
326 mutant strain is severely attenuated in capacity to cause necrotizing myositis in  
327 NHPs, thereby confirming the TraDIS screen finding (Figure 8, A-D). We next  
328 evaluated the potential role of *glgP* in carbohydrate metabolism. Although the  
329  $\Delta$ *glgP* mutant strain has no growth defect in medium with glucose, this mutant  
330 strain has a severe growth defect when maltose or maltodextrin is provided as  
331 the sole carbohydrate in the culture medium (Figure 9, A-C). Consistent with the  
332 idea that the product of the *glgP* gene is involved in glycogen and starch  
333 utilization, bacteria grown in THY supplemented with starch showed evidence of  
334 starch accumulation in the isogenic mutant strain  $\Delta$ *glgP*, but not the wild-type  
335 parental strain that retains the ability to metabolize starch (Figure 9D).  
336 Interestingly, in *E. coli*, glycogen accumulation is also significantly higher in *glgP*  
337 deletion mutants (72).

338 *Expression of the GAS genes implicated in in vivo fitness genes during*  
339 *NHP necrotizing myositis.* In the aggregate, data from the *in vivo* transposon  
340 mutant library screens and analysis of the isogenic mutant strains imply that the  
341 genes identified are expressed during NHP necrotizing myositis. To directly test  
342 for expression *in vivo*, we used TaqMan qRT-PCR to measure the transcript level  
343 of GAS transporter genes *Spy0014*, *Spy0271*, *braB*, *Spy1726*, *pptA*, and

344 metabolic gene *glgP* in the NHP muscle tissue infected with M1 GAS  
345 MGAS2221. The transcript of all six of the GAS fitness genes studied were  
346 detectable by TaqMan qRT-PCR, thereby confirming that these genes are  
347 expressed *in vivo* in NHP necrotizing myositis (Figure 10A).

348 *Expression of fitness genes in vivo in a human with necrotizing myositis.*

349 We next tested the hypothesis that the six targeted genes of interest are  
350 expressed in a human patient with necrotizing myositis. Necrotic skeletal muscle  
351 obtained from a patient with culture-proven GAS infection was studied by  
352 TaqMan qRT-PCR. The results confirmed the presence of transcripts from the  
353 six genes in the infected human patient (Figure 10B). Important to note, the  
354 relative transcript levels for all genes tested were closely similar in the  
355 experimentally infected NHPs and humans with natural infection.

356

357

## 358 **Discussion**

359 GAS is an abundant human pathogen that is responsible for substantial human  
360 illness and economic loss worldwide. Necrotizing fasciitis and myositis caused  
361 by this organism are particularly devastating infections because they have high  
362 morbidity and mortality. Effective treatment options for these infections remain  
363 limited and a licensed human GAS vaccine is not available. Thus, a fuller  
364 understanding of pathogen factors that contribute to these severe diseases is  
365 warranted and may facilitate translational research activities.



366 Our genome-wide screens identified 126 M1 genes and 116 M28 genes  
367 contributing to fitness in NHP necrotizing myositis. Of particular importance, we  
368 discovered a significant overlap between the genes identified in the M1 and M28  
369 *in vivo* fitness screens, with 72 genes common to both serotypes, representing  
370 57% and 64% of the M1 and M28 fitness genes, respectively. The similarity  
371 between M1 and M28 *in vivo* fitness gene results suggests the existence of  
372 conserved programs used by multiple diverse GAS strains to proliferate and  
373 damage tissue in necrotizing myositis. Many of the shared 72 genes encode  
374 proven or putative metabolic enzymes implicated in complex carbohydrate  
375 metabolism (*malM* and *glgP*), pyruvate metabolism (*acoA*, *acoB*, *acoL*), amino  
376 acid biosynthesis (*tkt*, *aroD*, *glnA*, and *arcB*), and nucleotide biosynthesis (*purA*  
377 and *purB*), suggesting these pathways are critical for GAS fitness in the  
378 environment of deep-tissue infection. In addition to metabolic genes, several  
379 previously identified GAS virulence or fitness factors were also among the 72  
380 genes. For example, ScfAB (two putative membrane proteins) were identified as  
381 important for GAS fitness and virulence during subcutaneous infection in mice  
382 (32). *adcABC* (zinc importer) is critical for GAS virulence in mice and has vaccine  
383 interest (52).

384 In contrast to the similar critical gene requirements for serotype M1 and  
385 M28 GAS during experimental NHP necrotizing myositis, there is relatively little  
386 overlap between M1 GAS genes required for necrotizing myositis and growth in  
387 human saliva *ex vivo* (Figure 4). That is, the spectrum of genes contributing to  
388 fitness in these two environments is largely distinct. For example, genes

389 encoding multiple amino acid transporters (*e.g.*, *Spy0014*, *braB* and *sstT*)  
390 required for GAS fitness during necrotizing myositis were not identified as  
391 important for growth *ex vivo* in human saliva (Figure 4A). In contrast, a GAS  
392 phosphate transporter encoded by the *pst* operon is essential for persistence in  
393 human saliva *ex vivo* but is apparently dispensable for NHP muscle infection  
394 (Figure 4A). These results suggest that amino acid uptake is critical for GAS  
395 fitness during muscle infections, whereas phosphate uptake is essential for  
396 growth in human saliva *ex vivo*. Similarly, GAS genes contributing to NHP  
397 necrotizing myositis and mouse subcutaneous infection also have relatively little  
398 overlap (Figure 4B). Many GAS metabolic genes are specifically required for  
399 NHP necrotizing myositis. For example, genes for *de novo* purine nucleotide  
400 biosynthesis (*purA* and *purB*), carbohydrate utilization (*glgP* and *malM*), and  
401 arginine and citrulline catabolism (*arcABCD*) are uniquely important for NHP  
402 necrotizing myositis. Moreover, several known streptococcal virulence-  
403 modulating factors were also identified in NHP necrotizing myositis. These  
404 include genes for GAS lipoprotein processing (*Igt* and *Isp*) (73-75), and genes for  
405 a two-component regulatory system that is essential for GAS to evade human  
406 innate immunity (*ihk* and *irr*) (76, 77) (Figure 4B). Taken together, these results  
407 suggest the nutritional environment and the survival pressures present in the  
408 infected NHP skeletal muscle are distinct from those in human saliva *ex vivo* and  
409 in a mouse subcutaneous infection model. These results imply that complex  
410 gene programs used by GAS to cause other types of human infections (*e.g.*,  
411 puerperal sepsis and pharyngitis) are also likely to be niche-specific.

412           A key theme of our M1 and M28 NHP genome-wide screens was  
413 identification of many genes encoding transporters that are required during  
414 necrotizing myositis. Pinpointing exactly which of the transporters contribute to  
415 bacterial virulence during necrotizing myositis sheds new light on the  
416 mechanisms of GAS-host interactions in this severe infection. We identified 13  
417 distinct transporters that are required in both M1 and M28 GAS strains. Six of  
418 these transporters are inferred to function in amino acid transport. This  
419 observation suggests the ability to efficiently acquire host amino acids is critical  
420 for the pathogenesis of GAS necrotizing myositis. *In vitro* growth assays showed  
421 that amino acid transporter mutant strains  $\Delta Spy0014$ ,  $\Delta braB$ , and  $\Delta Spy0271-$   
422  $0273$  have a significant growth defect in the peptide-free CDM that is ameliorated  
423 by supplementing CDM with tryptone, a source of abundant peptides. These  
424 results suggest that efficient amino acid uptake is critical for wild-type GAS  
425 growth when the peptide source is limited, and the nutritional environment of the  
426 infected muscle is probably a poor source of available peptides. GAS  
427 is auxotrophic for 15 amino acids considered essential for growth (68). We  
428 hypothesized that transporters Spy0014, BraB and Spy0271-0273 are required  
429 for the highly efficient uptake of certain essential amino acids. As anticipated, we  
430 showed that supplementing CDM with methionine, histidine, and valine restored  
431 the growth of mutant strains  $\Delta Spy0271-0273$ ,  $\Delta Spy0014$  and  
432  $\Delta braB$ , respectively, indicating these three transporters contribute to transport of  
433 these three amino acids. Interestingly, the concentration of free methionine,  
434 histidine, and valine in the human skeletal muscle tissue are 16.4 mg/L, 57.4

435 mg/L, and 30.5 mg/L, values lower than those present in CDM (100 mg/L) (78,  
436 79). In the aggregate, our results suggest efficient uptake of essential host amino  
437 acids such as methionine, histidine, and valine is important for GAS to cause  
438 necrotizing myositis in NHPs. The qRT-PCR data demonstrating the presence of  
439 transcripts from these transporter genes document that they are expressed in  
440 NHPs and infected humans. Together, this implies that blocking the uptake of  
441 essential amino acids by GAS might be a feasible strategy to control GAS  
442 infection pathology, but further studies are required to test this idea.

443         We identified several virulence-related transporters with unclear functions.  
444 One example is the putative ABC transporter comprised of Spy1726 (transporter  
445 permease protein), Spy1727 (ATP-binding protein), and Spy1728 (substrate-  
446 binding lipoprotein). The TraDIS screen results and the virulence phenotype of  
447 the isogenic mutant strain indicate this ABC transporter of unknown function is  
448 critical for the ability of GAS to cause NHP skeletal muscle pathology. Although  
449 its function is not known, multiple additional leads indicate ABC transporter  
450 Spy1726-1728 plays a role in host-pathogen interactions. For example, the  
451 Spy1726-1728 operon is upregulated when GAS cells are in human blood and  
452 macrophages (80, 81). In addition, Spy1726-1728 is regulated by the CovR/S  
453 two-component system, a global virulence gene regulator in GAS (82). Proteomic  
454 studies show that the substrate-binding lipoprotein Spy1726 is located on the  
455 bacterial cell surface, and thus might be a candidate for vaccine or other  
456 translational research (70). Future structural and functional studies on this  
457 transporter appear to be warranted.

458 To summarize, in this work we used two distinct transposon mutant  
459 libraries made in serotypes of GAS that cause abundant human cases of severe  
460 invasive infections to identify genes contributing to GAS fitness in an NHP model  
461 of necrotizing myositis. NHP infection using six isogenic mutant strains  
462 confirmed the crucial requirement for the genes identified by our TraDIS screens.  
463 Our findings complement work conducted with other transposon mutant screens  
464 that identified GAS genes contributing to fitness during growth *in vitro*, in human  
465 saliva and human blood *ex vivo*, and mouse subcutaneous infection. The findings  
466 presented herein may ultimately lead to better ways to diagnose, treat, and  
467 prevent necrotizing myositis and fasciitis caused by GAS, infections with  
468 devastating consequences to the human host.

469

470

## 471 **Methods**

472 *Bacterial strains.* Strain MGAS2221 is genetically representative of the  
473 pandemic clone of serotype M1 GAS that arose in the 1980s and has spread  
474 worldwide (20). Strain MGAS27961 is genetically representative of a virulent  
475 serotype M28 clone that is prevalent in the United States and elsewhere (44).  
476 These two strains have wild-type alleles of all major transcriptional regulators  
477 known to affect virulence, such as *covR* and *covS*, *ropB*, *mga*, and *rocA*.

478 *GAS strain growth conditions.* The GAS strains were cultured in Todd-  
479 Hewitt broth supplemented with 0.5% yeast extract (THY). When required, GAS  
480 strains were grown in a chemically defined medium (CDM) (79). Amino acids

481 were added to the designated concentration. For growth in medium with a  
482 carbohydrate source other than glucose, GAS strains were cultured in maltose  
483 medium and maltodextrin medium. The composition of these media is presented  
484 in Table S8.

485 *Transposon mutant libraries and culture conditions.* The mutant library  
486 generated in serotype M1 strain MGAS2221 using transposon plasmid  
487 pGh9:ISS1 was recently described (31, 49). The serotype M28 strain  
488 MGAS27961 transposon mutant library was made by essentially identical  
489 methods. The strains were grown in Todd-Hewitt broth supplemented with 0.2%  
490 yeast extract (THY) broth at 37° C with 5% CO<sub>2</sub>.

491 *Preparation of transposon mutant library frozen stock for nonhuman*  
492 *primate infection.* 100 µl of the stock transposon mutant library (M1 or M28 GAS  
493 library) was inoculated in 500 ml THY supplemented with 0.5 µg/ml erythromycin  
494 and cultured at 37° C for 8 hrs. The proliferated transposon library was pelleted  
495 by centrifugation, washed three times with saline, and then suspended in 10 ml  
496 saline supplemented with 20% glycerol. The suspended mutant library was  
497 aliquoted into cryogenic tubes and stored at -80° C until subsequent use in NHP  
498 infections.

499 *Nonhuman primate necrotizing myositis infection model used for TraDIS*  
500 *analysis.* A well-described NHP model of necrotizing myositis was used (18, 33).  
501 For the transposon mutant library screens, six cynomolgus macaques (1-3 years,  
502 2-4 kg, males and females) each were used for the serotype M1 and M28  
503 screens. Briefly, NHPs were sedated and bacteria were inoculated in the right

504 quadriceps. Animals were observed and necropsied 24 hours post-infection. To  
505 analyze the output transposon insertion library, a ~0.5 g (~0.5-1.0 cm diameter)  
506 biopsy of necrotic muscle was obtained from the inoculation site, homogenized in  
507 1 ml sterile PBS, transferred to 40 ml Todd Hewitt broth and incubated for 6 hrs.  
508 Before incubation, 100  $\mu$ l were removed from the 40 ml culture, serially diluted in  
509 sterile PBS and plated to determine the number of CFUs in the output library.  
510 Infected tissue was also collected for histologic examination. The inoculum used  
511 for the input M1 transposon mutant library was  $\sim 5 \times 10^8$  CFU/kg. The inoculum  
512 used for the input M28 transposon mutant library was  $1 \times 10^{10}$  CFU/kg. A higher  
513 dose of the M28 input transposon mutant library was used because in previous  
514 NHP studies, an approximately 10-to-100-fold higher inoculum of M28 strains  
515 compared to M1 strains was needed to generate similar disease character.

516 *DNA preparation and massively parallel sequencing.* The mutant library  
517 genomic DNA preparation and DNA sequencing were performed according to  
518 procedures described previously for TraDIS analysis (31, 49). The PCR-amplified  
519 libraries were sequenced with a NextSeq550 instrument (Illumina) using a single-  
520 end 75-cycle protocol.

521 *Processing of TraDIS sequencing reads and data analysis.* The  
522 processing of TraDIS reads and data analysis were performed according to  
523 previously described procedures (31). Briefly, the multiplexed raw Illumina reads  
524 obtained from the input and output mutant pools were parsed with FASTX  
525 Barcode Splitter ([http://hannonlab.cshl.edu/fastx\\_toolkit/commandline.html](http://hannonlab.cshl.edu/fastx_toolkit/commandline.html)). The  
526 resulting sequencing reads were analyzed with the TraDIS toolkit (83).

527 tradis\_comparison.R was used to compare the reads mapped per gene between  
528 the input pools (mutant libraries before NHP infection) and the output pools  
529 (mutant libraries recovered from infected NHP). The GAS genes with significantly  
530 changed mutant frequency (log<sub>2</sub> fold-change greater than +/-1, and *q* value <  
531 0.01) in the output mutant pools were interpreted as contributing to GAS fitness  
532 during NHP necrotizing myositis. Illumina sequencing reads of the M1 input  
533 library (*n* = 6), M1 output library (*n* = 6), M28 input library (*n* = 6), and M28 output  
534 library (*n* = 6) are deposited in the NCBI Sequence Read Archive (SRA) under  
535 the accession number (xxxxxxxxxx).

536 *Construction and characterization of isogenic mutant strains.* Isogenic  
537 mutant strains were derived from wild-type parental strain MGAS2221, the  
538 organism used for construction of the serotype M1 transposon mutant library.  
539 Primers used for generating the mutant strains are listed in Table S7. Markerless  
540 isogenic mutant strains were constructed by nonpolar deletion of the target  
541 gene(s) using allelic exchange (18). For example, to delete *Spy0014*, primer sets  
542 0014-1/2 and 0014-3/4 were used to amplify two ~1.5 kb fragments flanking  
543 *Spy0014* with genomic DNA purified from serotype M1 strain MGAS2221. The  
544 two flanking fragments were combined by overlap-extension PCR with primers  
545 0014-1 and 0014-4. The combined fragment was cloned into suicide vector  
546 pBBL740 and transformed into parental strain MGAS2221. The plasmid integrant  
547 was used for allelic exchange as described previously (18). PCR was used to  
548 identify potential mutant candidates containing the desired deletion. All other  
549 isogenic mutant strains were generated using analogous methods. Whole



550 genome sequencing of all isogenic mutant strains was done to confirm the  
551 absence of spurious mutations.

552 *Infection of NHPs with isogenic mutant strains.* To confirm the role of  
553 candidate genes in necrotizing myositis molecular pathogenesis and thereby  
554 validate the TraDIS data, the virulence of the parental wild-type strain  
555 MGAS2221 and the six isogenic deletion-mutant strains was assessed in the  
556 NHP necrotizing myositis infection model. Animals randomly assigned to  
557 different strain treatment groups received  $10^8$  CFU/kg of one strain (wild-type or  
558 isogenic mutant) in the right limb and a different strain in the left limb. Each  
559 strain was tested in triplicate. The animals were observed continuously and  
560 necropsied at 24 hrs post-inoculation.

561 *Histopathology analysis.* For histology evaluation, lesions were excised,  
562 and visually inspected. Lesions (necrotic muscle) were measured in three  
563 dimensions and volume was calculated using the formula for an ellipsoid. Tissue  
564 taken from the inoculation site was trisected, fixed in 10% phosphate buffered  
565 formalin, and embedded in paraffin using standard automated instruments.  
566 Histology of the three sections taken from each limb was scored by a pathologist  
567 blinded to the strain treatment groups as described previously (18, 19). To obtain  
568 the quantitative CFU data, diseased muscle obtained from the inoculation site or  
569 distal hip margin was weighed, homogenized (Omni International) in 1 mL PBS,  
570 and CFUs were determined by plating serial dilutions of the homogenate.  
571 Statistical differences between strain groups were determined using the Mann-  
572 Whitney test.

573 *Iodine staining of wild-type and  $\Delta$ glgP mutant strain.* The wild-type strain  
574 and isogenic  $\Delta$ glgP mutant strain were cultured for eight hours in 10 ml of THY  
575 supplemented with 2g/L of soluble starch (Sigma-Aldrich). GAS cells were  
576 pelleted and washed five times with saline to remove the culture medium. After  
577 the final saline wash, GAS cells were suspended in 1ml of saline. 10  $\mu$ l of Gram's  
578 iodine solution was added to the cell suspensions to visualize glycogen  
579 accumulation in the GAS cell. Only the  $\Delta$ glgP mutant strain displayed a dark blue  
580 iodine stain phenotype.

581 *Isolation of total RNA from GAS-infected non-human primates quadriceps*  
582 *muscle sections and skeletal muscle from a human with GAS necrotizing*  
583 *fasciitis.* Infected tissue from NHPs or human patients was stored at -80°C in  
584 DNA/RNA Shield (Zymo Research) or RNAlater (Invitrogen), respectively,  
585 thawed on ice, transferred to a tube containing 2 ml of cold TE, and diluted with  
586 either 2 ml or 1.3 ml 2X DNA/RNA Shield. Tissue samples were homogenized  
587 with an Omni TH homogenizer (Omni International). Prior to lysis the  
588 supernatants were divided into either four aliquots each containing 900  $\mu$ l, or 3  
589 aliquots each containing 950  $\mu$ l, for NHP or human samples, respectively. The  
590 tissues were lysed by ballistic disintegration using a FastPrep-96 instrument (MP  
591 Biomedicals) and Zymo tubes containing 0.1 and 0.5-mm ZR BashingBeads  
592 (Zymo Research). Lysis was repeated three times at 1,600 rpm for 1 min, and  
593 tubes were placed on ice for 1 min after each lysis step. Particulate matter  
594 present in the supernatants was eliminated with QIAshredder homogenizers  
595 (Qiagen). RNA was isolated using the Zymobiomics RNA kit (Zymo Research)

596 following the manufacturer instructions with the exceptions that all aliquots from a  
597 particular sample were pooled together before passing them through the first  
598 column and the recommended DNase treatment was performed twice for the  
599 human samples. Total RNA quality was assessed with an RNA Nanochip and an  
600 Agilent 2100 Bioanalyzer (Agilent Technologies).

601 *qRT-PCR analysis of infected NHP and human muscle.* Total RNA  
602 extracted from infected NHP or human skeletal muscle was converted into cDNA  
603 using Superscript III reverse transcriptase, random primers, RNase OUT and  
604 dNTPs (all from Invitrogen). Quantitative RT-PCR (qRT-PCR) was performed  
605 using Taqman fast universal PCR master mix (Applied Biosystems) with an ABI  
606 7500 Fast System instrument (Life Technologies). The genes tested were  
607 *Spy0014*, *Spy0271*, *braB*, *Spy1726*, *pptA*, and *glgP*. The sequences of primers  
608 and probes used in the qRT-PCR experiments are listed in the Table S9. Each  
609 experiment was performed with three technical replicates at three different  
610 dilutions. Transcript levels were normalized relative to the *rpsL* gene (encoding  
611 30S ribosomal protein S12).

612 *Statistics.* Results of lesion volume and CFU recovery from NHPs are  
613 expressed as mean  $\pm$  SEM, with statistically significant differences determined  
614 using the Mann-Whitney test (Prism 6, Graphpad Software). Results of histology  
615 scoring of infected NHP muscle are expressed as mean  $\pm$  SEM, with statistically  
616 significant differences determined using the Wilcoxon Rank Sum Test (Prism 6).  
617 Nonparametric tests were used because the data were shown to not follow a  
618 normal distribution using the Shapiro-Wilk test (Prism 6).

619            *Study approvals.* All animal experiments were approved by the  
620 Institutional Animal Care and Use Committee of Houston Methodist Research  
621 Institute (protocol AUP-1217-0058). The human tissue was collected as part of a  
622 study approved by the Institutional Review Board at Houston Methodist Research  
623 Institute (protocol 0907-0151).

624

625

626    **Author contributions**

627 LZ performed and analyzed TraDIS experiments, constructed and characterized  
628 isogenic mutant strains and wrote the manuscript. RJO planned and conducted  
629 experiments involving the NHPs, analyzed resulting data and wrote the  
630 manuscript. SBB analyzed the genomic data and wrote the manuscript. JME  
631 contributed critical discussions about transporter physiology and performed the  
632 TaqMan qRT-PCR to measure the transcript level of GAS transporter genes in  
633 infected NHP and human muscle. MOS performed the genome sequencing of  
634 the isogenic mutant strains and provided technical support for the NHP studies.  
635 SLK constructed and characterized isogenic mutant strains. CCC provided  
636 extensive technical support for all phases of the study. ARLC and ASW provided  
637 intellectual guidance for the TraDIS data analysis. LJ oversaw and performed  
638 the NHP experiments. JMM designed the studies, analyzed experiments, wrote  
639 the manuscript and oversaw the project.

640

641 Supplemental material

642

## 643 Acknowledgments

644 This work was supported by funds from the Fondren Foundation (to James M.  
645 Musser). Amelia R. L. Charbonneau is supported by the University of Cambridge  
646 Doctoral Training Partnership scheme, which is funded by the Biotechnology and  
647 Biological Sciences Research Council, UK (reference 1503883). We thank Drs.  
648 Frank DeLeo, Magnus Gottsfredsson, Karl G. Kristinsson, David M. Morens, and  
649 Kathryn E. Stockbauer for critical reading of the manuscript and suggesting  
650 improvements. We are indebted to Dr. Lillian S. Kao for providing tissue  
651 specimens from a patient with necrotizing myositis. We thank Annessa Smith  
652 and Caroline White for superb veterinary technical assistance.

653

654

655 Footnotes

656

657 **Conflicts of interest:** The authors have declared that no conflicts of interest  
658 exist.

659

660

661

662

663

664

665

666

667

668

669

670

671 **Figures and figure legends**

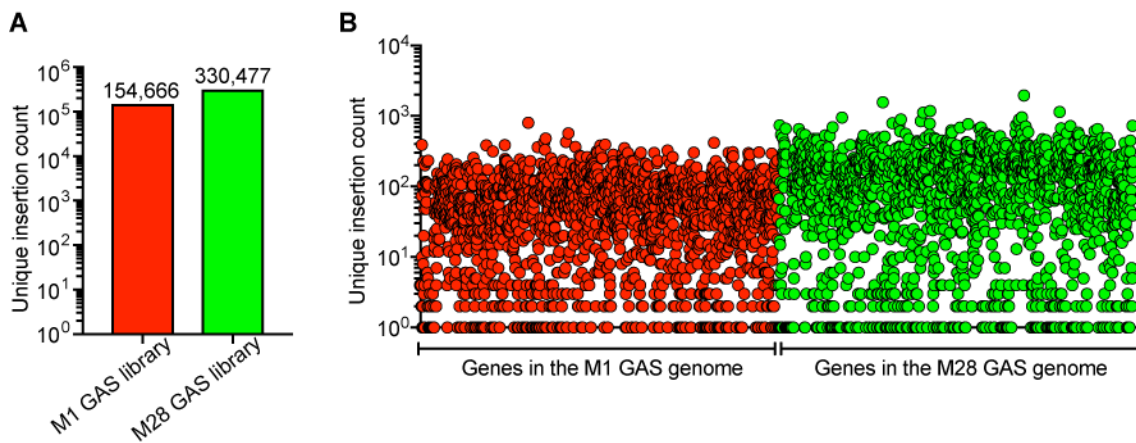

672

673

674 **Figure 1. Characterization of the serotype M1 and M28 transposon mutant**  
675 **libraries. (A)** Overall unique transposon insertion count of the serotype M1 (red)  
676 and M28 (green) mutant libraries. **(B)** Unique transposon insertion count of each  
677 gene in the serotype M1 (red circle) and M28 (green circle) genomes.

678

679

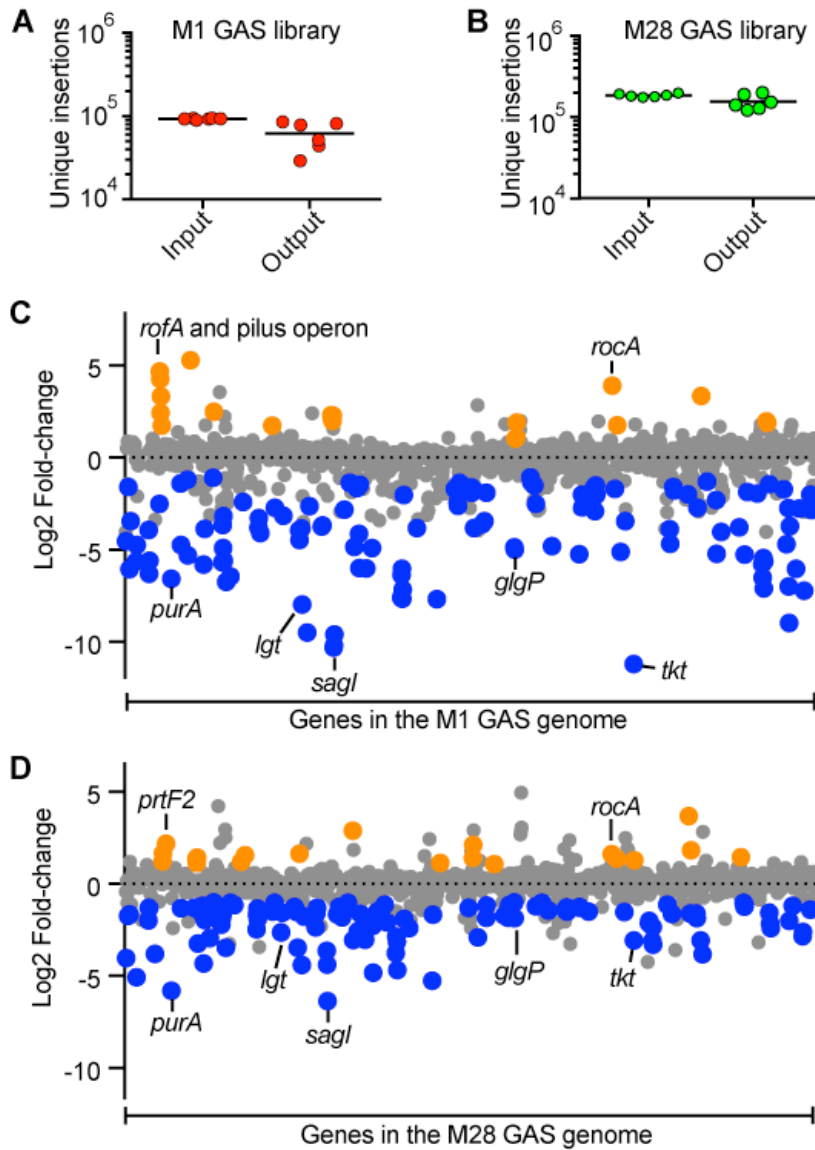

680

681 **Figure 2. TraDIS analysis of GAS gene fitness in NHP necrotizing myositis.**  
682 Complexity of the (A) M1 GAS mutant pools and (B) M28 GAS mutant pools  
683 before and after a 24-hr experimental NHP infection. Genome-scale summary of  
684 the changes in mutant abundance (y axis) for each of the genes (x axis) in the  
685 (C) M1 GAS output pools and (D) M28 GAS output pools. Gene mutations  
686 (insertions) conferring significantly decreased (blue dots) or increased (gold dots)  
687 fitness are highlighted.

688

689

690

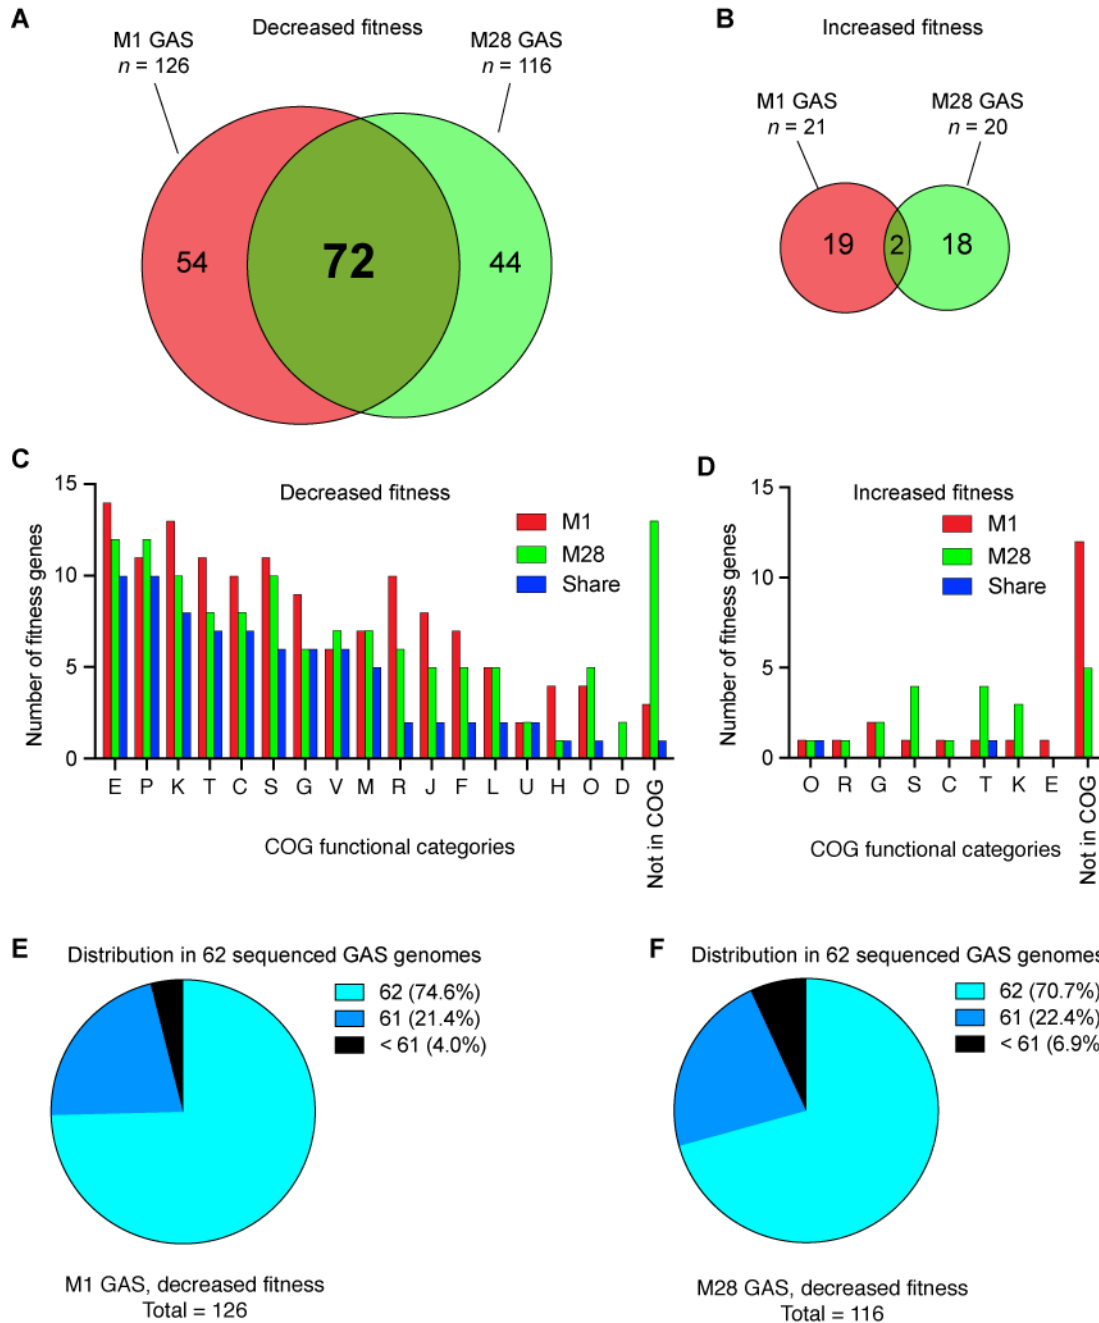

691

692 **Figure 3. GAS gene mutations conferring significantly altered fitness**  
 693 **during necrotizing myositis.** Venn diagrams showing the number of mutated  
 694 genes conferring significantly decreased fitness (**A**) and increased fitness (**B**) in  
 695 M1 and M28 GAS strains during NHP infections. (**C, D**) Functional categorization  
 696 of the identified GAS *in vivo* fitness genes during necrotizing myositis. (**E, F**)  
 697 Distribution of the M1 and M28 GAS genes required for infection among the 62  
 698 sequenced GAS genomes. COG, clusters of orthologous groups.  
 699



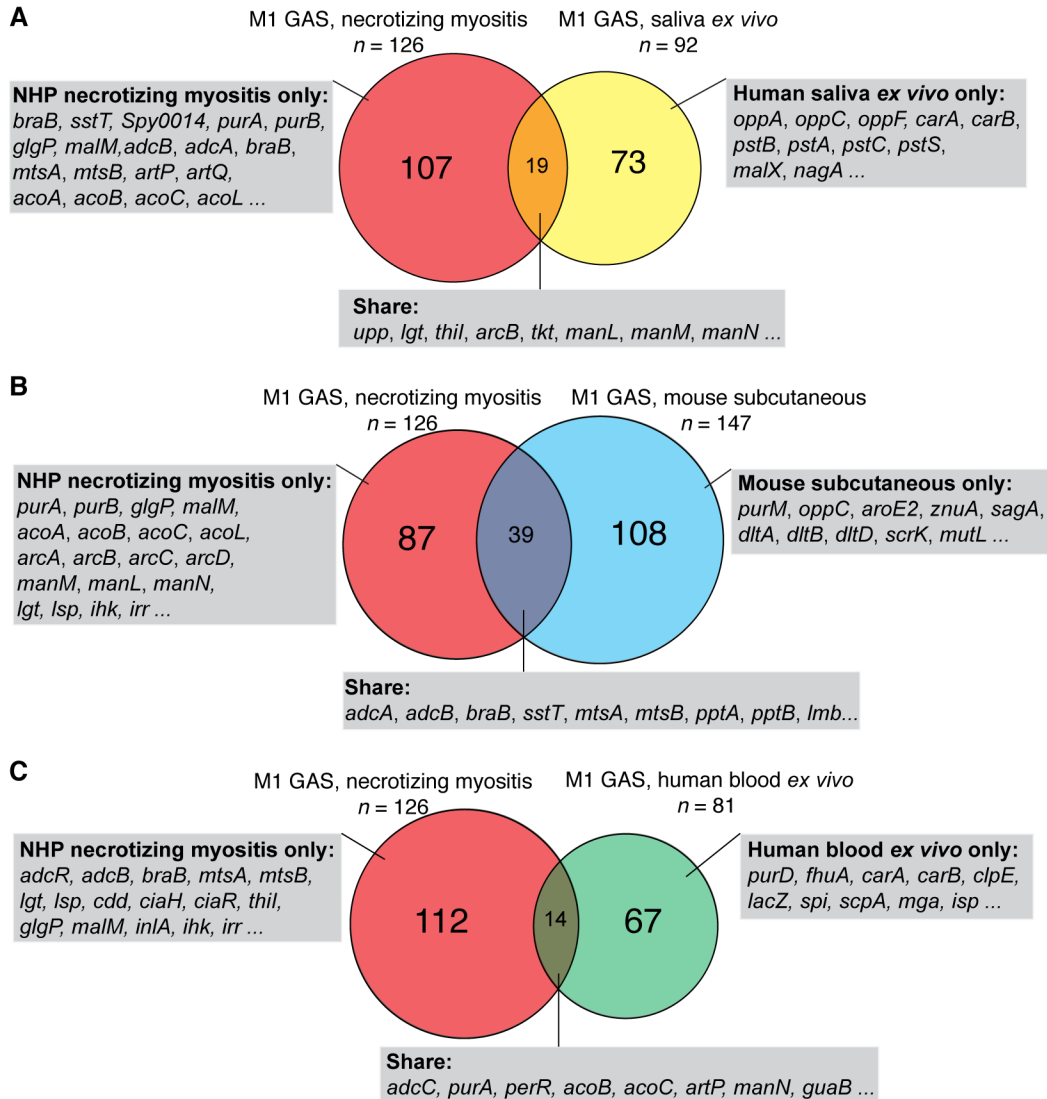

700

701 **Figure 4. Lack of substantial overlap between GAS fitness genes required**  
 702 **for necrotizing myositis and those required in other *in vitro* and *in vivo***  
 703 **environments. (A)** Venn diagram comparison of 126 genes required for NHP  
 704 necrotizing myositis with 92 genes required for optimal growth in human saliva ex  
 705 *vivo*. **(B)** Venn diagram comparison of 126 genes required for necrotizing  
 706 myositis with 147 genes required for mouse subcutaneous infection (32). **(C)**  
 707 Venn diagram comparison of the 126 genes required for necrotizing myositis with  
 708 81 genes required for GAS growth in human blood ex vivo. Representative genes  
 709 belonging to each category are listed in the shaded rectangular boxes **(A, B and**  
 710 **C).**

711

712

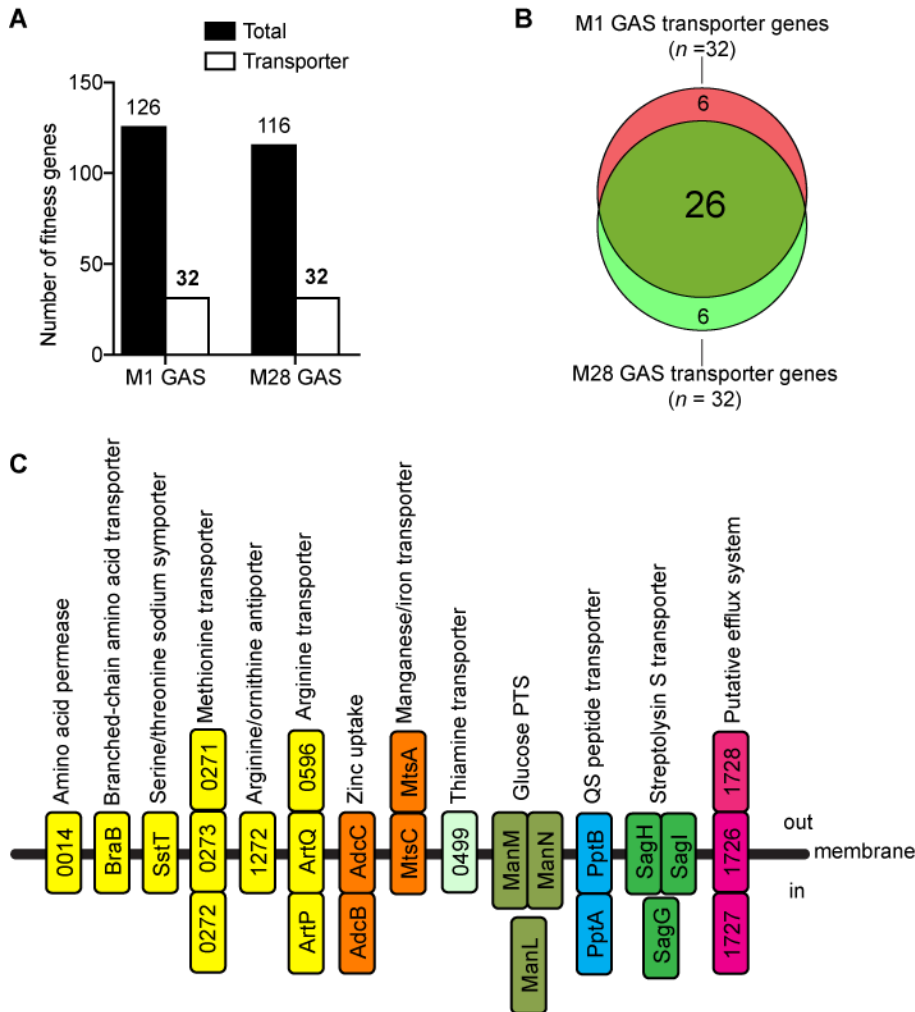

713

714 **Figure 5. Genes encoding proven or putative transporters are an abundant**  
715 **portion of fitness genes that are required during necrotizing myositis in**  
716 **NHPs. (A)** M1 GAS fitness genes ( $n = 32$ , 25.4%) and M28 GAS fitness genes ( $n$   
717  $= 32$ , 27.6%) that encode proven or putative transporters. **(B)** Venn diagram  
718 showing the relationship between M1 and M28 transporter genes required during  
719 NHP skeletal muscle infections; 26 genes are required in both M1 and M28 GAS  
720 strains. **(C)** Schematic showing the proven or putative transporters encoded by  
721 the 26 shared transporter genes and their inferred functions. Inferred transporter  
722 elements (Spy0271, Spy0596, MtsA, and Spy1728) that are likely positioned  
723 outside of the bacterial cell are putative lipoproteins. Elements that are inferred to  
724 be positioned on the membrane and in the bacterial cell are putative  
725 transmembrane proteins and cytosolic proteins, respectively. The locus tag  
726 numbers refer to the annotation for serotype M1 GAS strain MGAS5005.

727

728

729

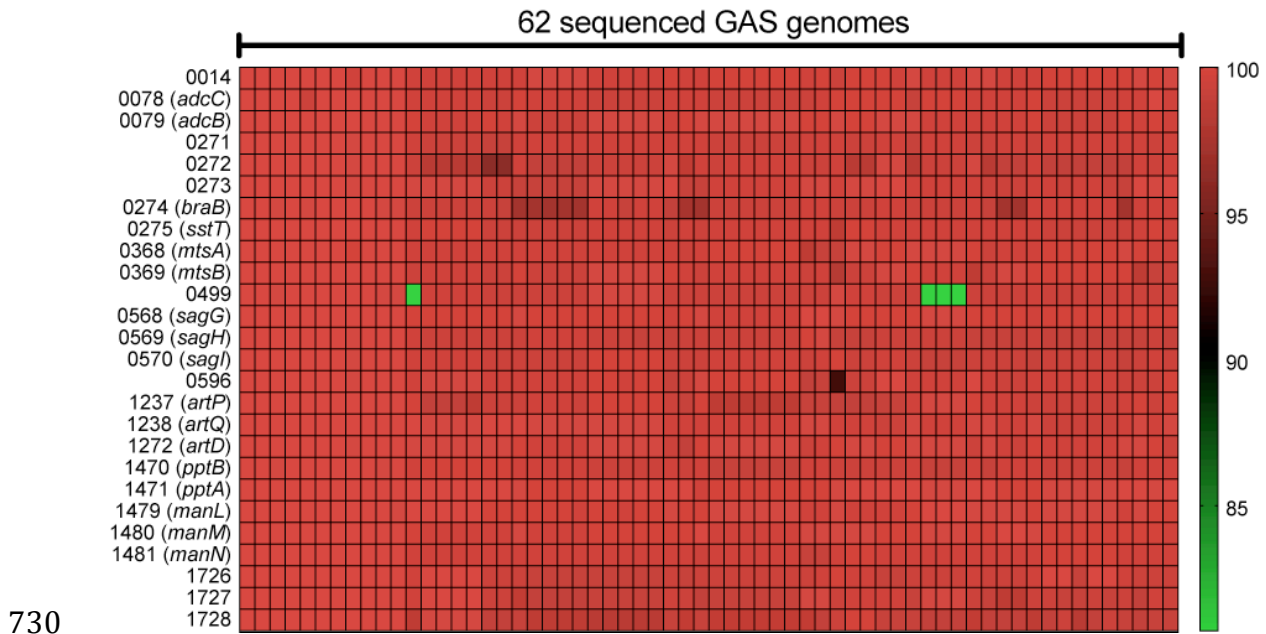

731 **Figure 6. Conservation of the 26 GAS transporter genes among 62**  
732 **sequenced GAS genomes.** Heat map showing the percent identity of the 26  
733 transporter genes of the 62 sequenced genomes (representing 26 different M  
734 protein serotypes) relative to those of the serotype M1 reference strain  
735 MGAS5005. The locus tag numbers refer to the annotation for serotype M1 GAS  
736 strain MGAS5005.

737

738

739

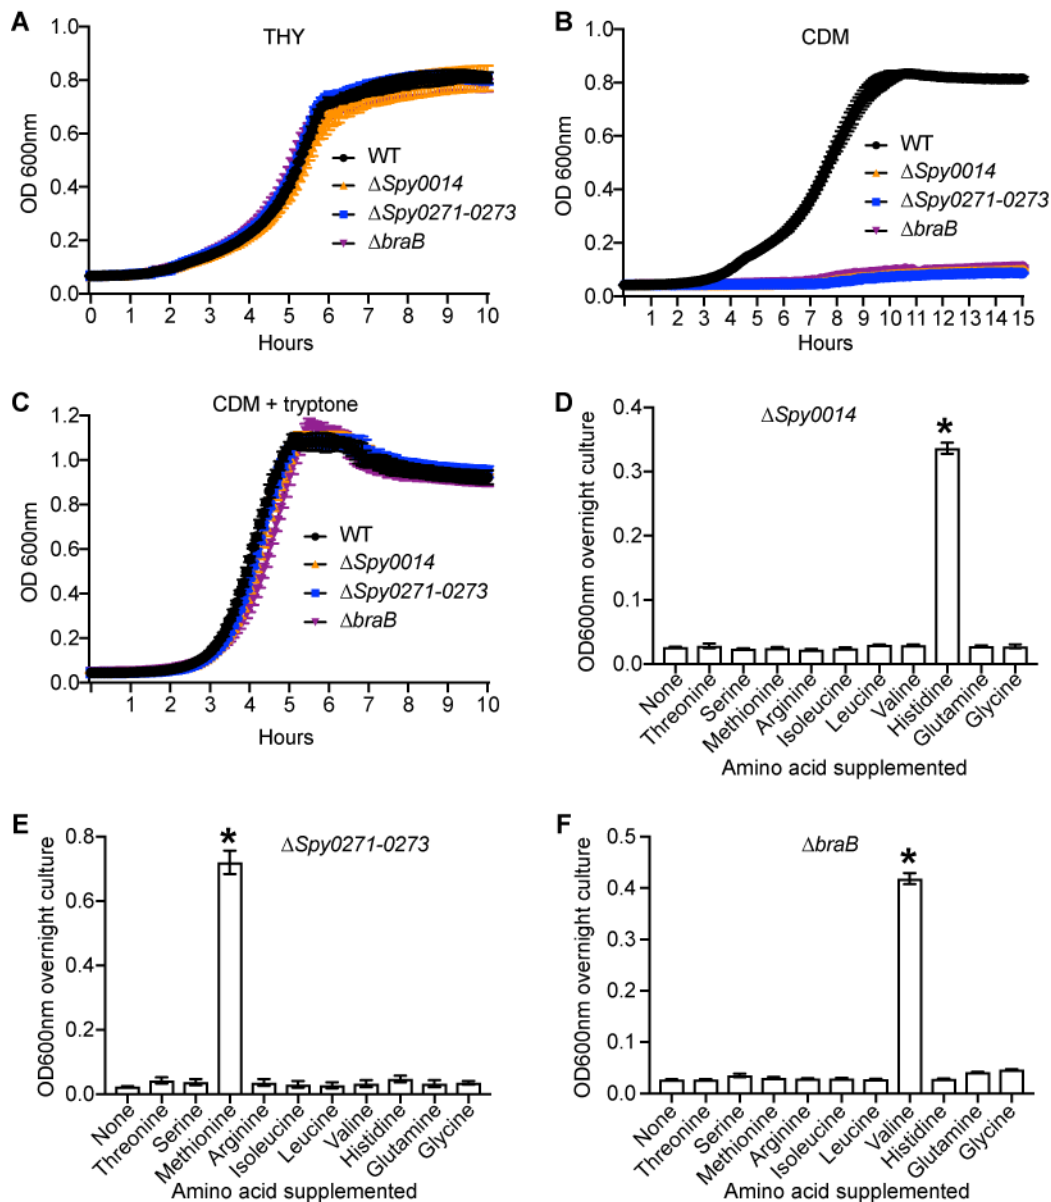

740

741 **Figure 7. *In vitro* phenotype of three amino acid transporter mutant strains.**

742 (A-C) Growth of parental wild-type strain MGAS2221 (WT),  $\Delta$ Spy0014,  $\Delta$ braB,  
 743 and  $\Delta$ Spy0271-0273 in rich medium THY (A), chemically defined medium (B),  
 744 and chemically defined medium supplemented with 10g/L tryptone (C). (D-F)  
 745 Growth of three mutant strains in CDM supplemented with 1g/L of specified  
 746 amino acids. Experiments were performed in triplicate on 3 separate occasions.  
 747 Replicate data are expressed as the mean  $\pm$  SD in D, E, and F. \* $P < 0.05$  vs.  
 748 unsupplemented group, one-way ANOVA.

749

750

751

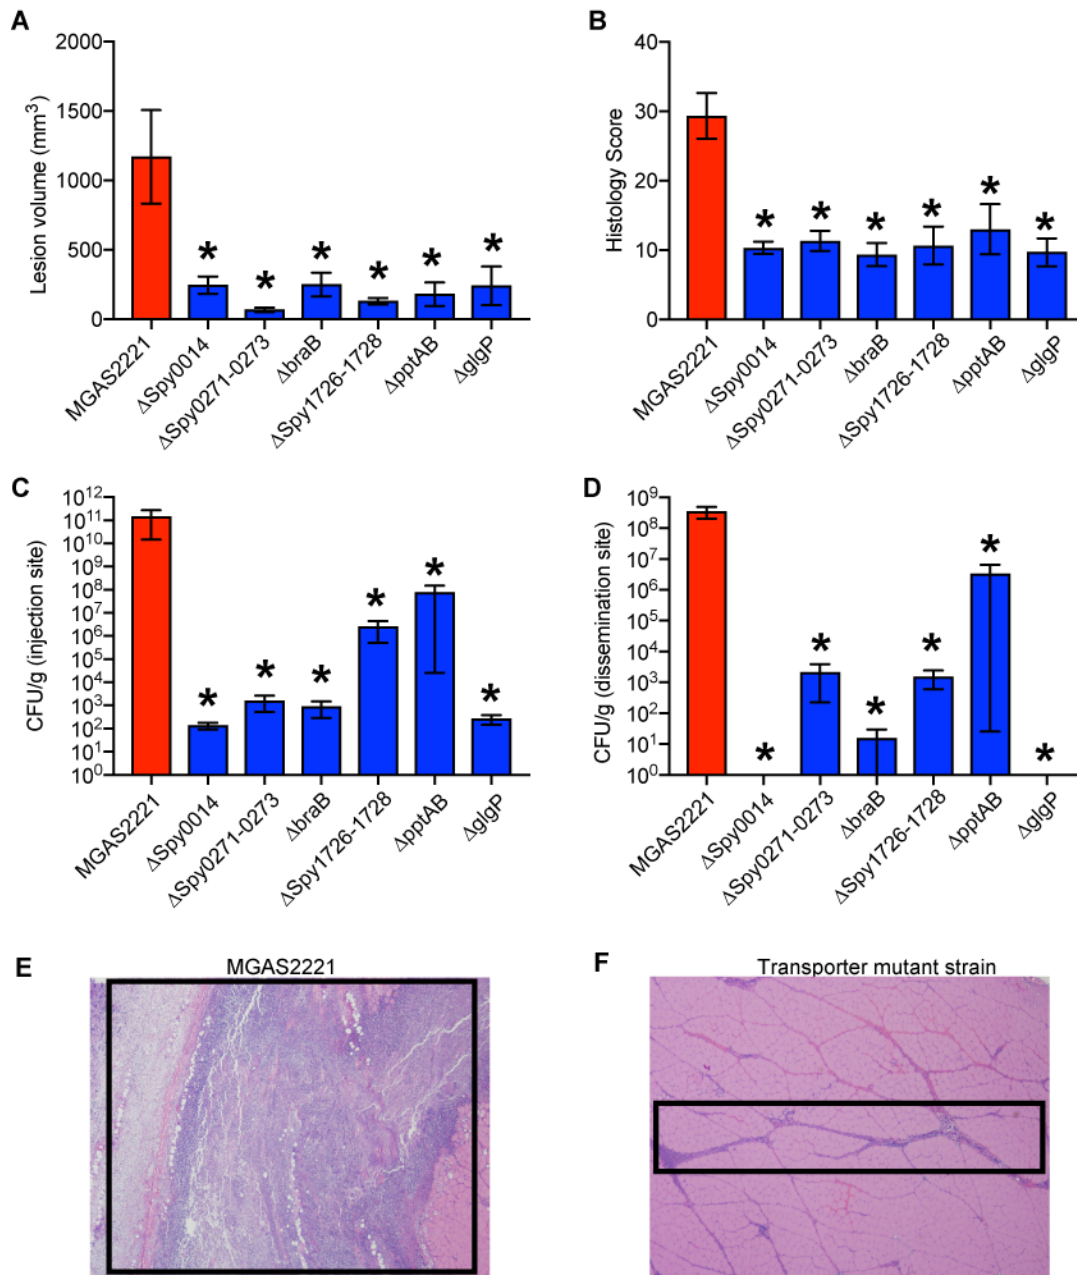

**Figure 8. Virulence phenotypes of GAS isogenic transporter deletion mutant strains in NHPs.** (A,B) Volume (left) and histology score (right) of the necrotizing myositis lesions caused by the parental wild-type M1 GAS strain MGAS2221 compared to each isogenic deletion mutant strain. (C,D) Colony forming units recovered from the inoculation site (left) and distal muscle margin (right). For all panels, mean ± SEM is shown. \**P*<0.05, Mann-Whitney test (panels A, C and D) or Wilcoxon Rank Sum test (panel B). Micrographs of hematoxylin and eosin necrotizing myositis lesions caused by the parental wild-type stain (E) compared to a representative transporter mutant strain ΔSpy0014 (F). The boxes enclose each necrotic lesion (original magnification 2x).

752  
753  
754  
755  
756  
757  
758  
759  
760  
761  
762  
763

764

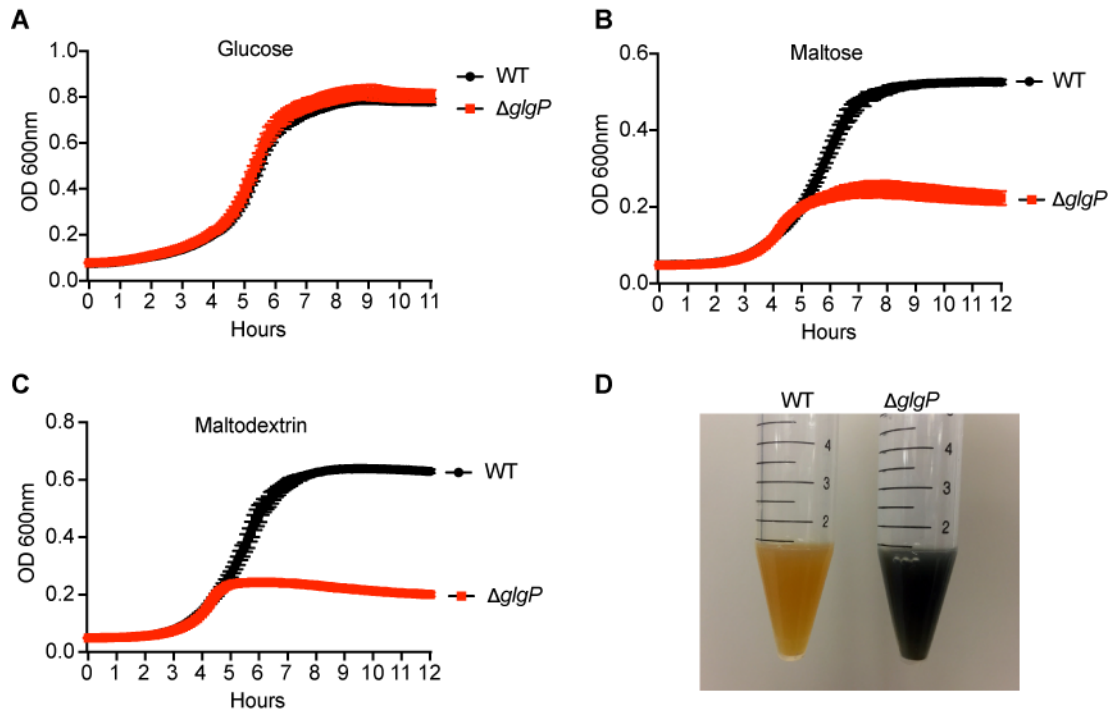

765

766

767 **Figure 9. *In vitro* phenotype of isogenic mutant strain  $\Delta glgP$ .** Growth of WT  
768 and isogenic mutant  $\Delta glgP$  in THY broth with glucose as the sole carbohydrate  
769 source (A), THY with maltose as the sole carbohydrate source (B), and THY with  
770 maltodextrin as the sole carbohydrate source (C). (D) Accumulation of starch by  
771 the  $\Delta glgP$  mutant strain.

772

773

774

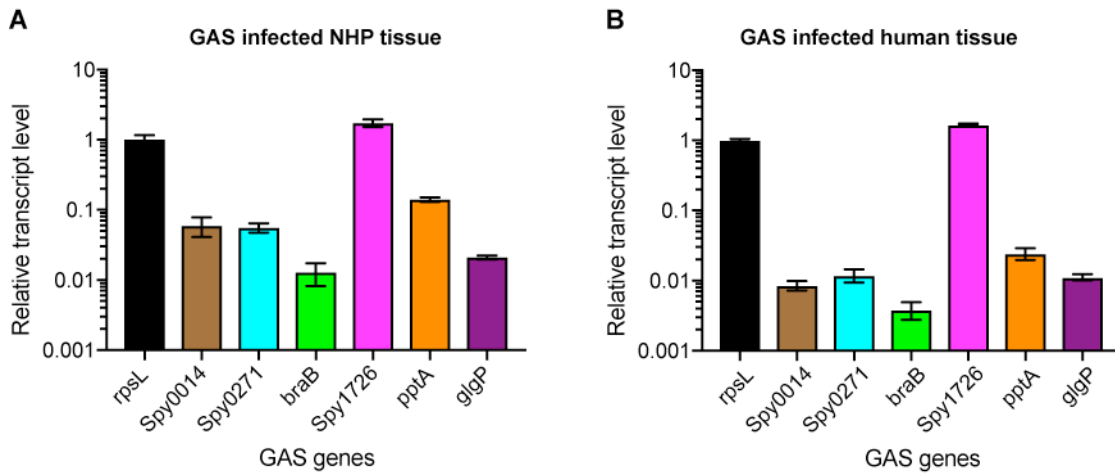

775

776

777 **Figure 10. Relative transcript level of GAS fitness genes in NHP necrotizing**  
778 **myositis (A) and in an infected human with necrotizing fasciitis (B).** *In vivo*  
779 transcript level of GAS genes *Spy0014*, *Spy0271*, *braB*, *Spy1726*, *pptA*, and *glgP*  
780 relative to housekeeping gene *rpsL*. The experiment was performed in triplicate,  
781 and mean  $\pm$  SD are shown.

782

783

784

785

786

787

788

789

790

791

792

793

794

## 795 Reference

- 796 1. Olsen RJ, and Musser JM. Molecular pathogenesis of necrotizing fasciitis.  
797 *Annu Rev Pathol.* 2010;5(1-31).
- 798 2. Stevens DL, and Bryant AE. Necrotizing Soft-Tissue Infections. *N Engl J Med.*  
799 2017;377(23):2253-65.
- 800 3. Misiakos EP, Bagias G, Patapis P, Sotiropoulos D, Kanavidis P, and Machairas  
801 A. Current concepts in the management of necrotizing fasciitis. *Front Surg.*  
802 2014;1(36).
- 803 4. Nelson GE, Pondo T, Toews KA, Farley MM, Lindegren ML, Lynfield R, Aragon  
804 D, Zansky SM, Watt JP, Cieslak PR, et al. Epidemiology of Invasive Group A  
805 Streptococcal Infections in the United States, 2005-2012. *Clin Infect Dis.*  
806 2016;63(4):478-86.
- 807 5. Lepoutre A, Doloy A, Bidet P, Leblond A, Perrocheau A, Bingen E, Trieu-Cuot  
808 P, Bouvet A, Poyart C, Levy-Bruhl D, et al. Epidemiology of invasive  
809 Streptococcus pyogenes infections in France in 2007. *J Clin Microbiol.*  
810 2011;49(12):4094-100.
- 811 6. Carapetis JR, Steer AC, Mulholland EK, and Weber M. The global burden of  
812 group A streptococcal diseases. *Lancet Infect Dis.* 2005;5(11):685-94.
- 813 7. Cunningham MW. Pathogenesis of group A streptococcal infections. *Clin*  
814 *Microbiol Rev.* 2000;13(3):470-511.
- 815 8. Shannon O, Hertzén E, Norrby-Teglund A, Morgelin M, Sjöbring U, and Björck  
816 L. Severe streptococcal infection is associated with M protein-induced  
817 platelet activation and thrombus formation. *Mol Microbiol.* 2007;65(5):1147-  
818 57.
- 819 9. Pahlman LI, Morgelin M, Eckert J, Johansson L, Russell W, Riesbeck K,  
820 Soehnlein O, Lindbom L, Norrby-Teglund A, Schumann RR, et al.  
821 Streptococcal M protein: a multipotent and powerful inducer of  
822 inflammation. *J Immunol.* 2006;177(2):1221-8.
- 823 10. Olsen RJ, Sitkiewicz I, Ayeras AA, Gonulal VE, Cantu C, Beres SB, Green NM,  
824 Lei B, Humbird T, Greaver J, et al. Decreased necrotizing fasciitis capacity  
825 caused by a single nucleotide mutation that alters a multiple gene virulence  
826 axis. *Proc Natl Acad Sci U S A.* 2010;107(2):888-93.
- 827 11. Hytonen J, Haataja S, Gerlach D, Podbielski A, and Finne J. The SpeB virulence  
828 factor of Streptococcus pyogenes, a multifunctional secreted and cell surface  
829 molecule with streptadhesin, laminin-binding and cysteine protease activity.  
830 *Mol Microbiol.* 2001;39(2):512-9.
- 831 12. Lukomski S, Montgomery CA, Rurangirwa J, Geske RS, Barrish JP, Adams GJ,  
832 and Musser JM. Extracellular cysteine protease produced by Streptococcus  
833 pyogenes participates in the pathogenesis of invasive skin infection and  
834 dissemination in mice. *Infect Immun.* 1999;67(4):1779-88.
- 835 13. Lukomski S, Burns EH, Jr., Wyde PR, Podbielski A, Rurangirwa J, Moore-  
836 Poveda DK, and Musser JM. Genetic inactivation of an extracellular cysteine  
837 protease (SpeB) expressed by Streptococcus pyogenes decreases resistance



- 838 to phagocytosis and dissemination to organs. *Infect Immun*. 1998;66(2):771-  
839 6.
- 840 14. Wessels MR, Moses AE, Goldberg JB, and DiCesare TJ. Hyaluronic acid capsule  
841 is a virulence factor for mucoid group A streptococci. *Proc Natl Acad Sci U S A*.  
842 1991;88(19):8317-21.
- 843 15. Bricker AL, Carey VJ, and Wessels MR. Role of NADase in virulence in  
844 experimental invasive group A streptococcal infection. *Infect Immun*.  
845 2005;73(10):6562-6.
- 846 16. Timmer AM, Timmer JC, Pence MA, Hsu LC, Ghochani M, Frey TG, Karin M,  
847 Salvesen GS, and Nizet V. Streptolysin O promotes group A Streptococcus  
848 immune evasion by accelerated macrophage apoptosis. *J Biol Chem*.  
849 2009;284(2):862-71.
- 850 17. Zhu L, Olsen RJ, Lee JD, Porter AR, DeLeo FR, and Musser JM. Contribution of  
851 Secreted NADase and Streptolysin O to the Pathogenesis of Epidemic  
852 Serotype M1 Streptococcus pyogenes Infections. *Am J Pathol*. 2016.
- 853 18. Zhu L, Olsen RJ, Nasser W, Beres SB, Vuopio J, Kristinsson KG, Gottfredsson  
854 M, Porter AR, DeLeo FR, and Musser JM. A molecular trigger for  
855 intercontinental epidemics of group A Streptococcus. *J Clin Invest*.  
856 2015;125(9):3545-59.
- 857 19. Zhu L, Olsen RJ, Nasser W, de la Riva Morales I, and Musser JM. Trading  
858 Capsule for Increased Cytotoxin Production: Contribution to Virulence of a  
859 Newly Emerged Clade of emm89 Streptococcus pyogenes. *MBio*.  
860 2015;6(5):e01378-15.
- 861 20. Nasser W, Beres SB, Olsen RJ, Dean MA, Rice KA, Long SW, Kristinsson KG,  
862 Gottfredsson M, Vuopio J, Raisanen K, et al. Evolutionary pathway to  
863 increased virulence and epidemic group A Streptococcus disease derived  
864 from 3,615 genome sequences. *Proc Natl Acad Sci U S A*.  
865 2014;111(17):E1768-76.
- 866 21. Beres SB, Kachroo P, Nasser W, Olsen RJ, Zhu L, Flores AR, de la Riva I, Paez-  
867 Mayorga J, Jimenez FE, Cantu C, et al. Transcriptome Remodeling Contributes  
868 to Epidemic Disease Caused by the Human Pathogen Streptococcus  
869 pyogenes. *MBio*. 2016;7(3).
- 870 22. Maruyama F, Watanabe T, and Nakagawa I. In: Ferretti JJ, Stevens DL, and  
871 Fischetti VA eds. *Streptococcus pyogenes : Basic Biology to Clinical*  
872 *Manifestations*. Oklahoma City (OK); 2016.
- 873 23. Beres SB, and Musser JM. Contribution of exogenous genetic elements to the  
874 group A Streptococcus metagenome. *PLoS One*. 2007;2(8):e800.
- 875 24. Kizy AE, and Neely MN. First Streptococcus pyogenes signature-tagged  
876 mutagenesis screen identifies novel virulence determinants. *Infect Immun*.  
877 2009;77(5):1854-65.
- 878 25. Armbruster CE, Forsyth-DeOrnellas V, Johnson AO, Smith SN, Zhao L, Wu W,  
879 and Mobley HLT. Genome-wide transposon mutagenesis of *Proteus mirabilis*:  
880 Essential genes, fitness factors for catheter-associated urinary tract infection,  
881 and the impact of polymicrobial infection on fitness requirements. *PLoS*  
882 *Pathog*. 2017;13(6):e1006434.

- 883 26. Gawronski JD, Wong SM, Giannoukos G, Ward DV, and Akerley BJ. Tracking  
884 insertion mutants within libraries by deep sequencing and a genome-wide  
885 screen for Haemophilus genes required in the lung. *Proc Natl Acad Sci U S A*.  
886 2009;106(38):16422-7.
- 887 27. Subashchandrabose S, Smith SN, Spurbeck RR, Kole MM, and Mobley HL.  
888 Genome-wide detection of fitness genes in uropathogenic Escherichia coli  
889 during systemic infection. *PLoS Pathog*. 2013;9(12):e1003788.
- 890 28. Wang N, Ozer EA, Mandel MJ, and Hauser AR. Genome-wide identification of  
891 Acinetobacter baumannii genes necessary for persistence in the lung. *MBio*.  
892 2014;5(3):e01163-14.
- 893 29. Weerdenburg EM, Abdallah AM, Rangkuti F, Abd El Ghany M, Otto TD,  
894 Adroub SA, Molenaar D, Ummels R, Ter Veen K, van Stempvoort G, et al.  
895 Genome-wide transposon mutagenesis indicates that Mycobacterium  
896 marinum customizes its virulence mechanisms for survival and replication in  
897 different hosts. *Infect Immun*. 2015;83(5):1778-88.
- 898 30. Le Breton Y, Mistry P, Valdes KM, Quigley J, Kumar N, Tettelin H, and McIver  
899 KS. Genome-wide identification of genes required for fitness of group A  
900 Streptococcus in human blood. *Infect Immun*. 2013;81(3):862-75.
- 901 31. Zhu L, Charbonneau ARL, Waller AS, Olsen RJ, Beres SB, and Musser JM. Novel  
902 Genes Required for the Fitness of Streptococcus pyogenes in Human Saliva.  
903 *mSphere*. 2017;2(6).
- 904 32. Le Breton Y, Belew AT, Freiberg JA, Sundar GS, Islam E, Lieberman J, Shirtliff  
905 ME, Tettelin H, El-Sayed NM, and McIver KS. Genome-wide discovery of novel  
906 M1T1 group A streptococcal determinants important for fitness and  
907 virulence during soft-tissue infection. *PLoS Pathog*. 2017;13(8):e1006584.
- 908 33. Eraso JM, Olsen RJ, Beres SB, Kachroo P, Porter AR, Nasser W, Bernard PE,  
909 DeLeo FR, and Musser JM. Genomic Landscape of Intrahost Variation in  
910 Group A Streptococcus: Repeated and Abundant Mutational Inactivation of  
911 the fabT Gene Encoding a Regulator of Fatty Acid Synthesis. *Infect Immun*.  
912 2016;84(12):3268-81.
- 913 34. Fittipaldi N, Beres SB, Olsen RJ, Kapur V, Shea PR, Watkins ME, Cantu CC,  
914 Laucirica DR, Jenkins L, Flores AR, et al. Full-genome dissection of an  
915 epidemic of severe invasive disease caused by a hypervirulent, recently  
916 emerged clone of group A Streptococcus. *Am J Pathol*. 2012;180(4):1522-34.
- 917 35. Sun H, Ringdahl U, Homeister JW, Fay WP, Engleberg NC, Yang AY, Rozek LS,  
918 Wang X, Sjobring U, and Ginsburg D. Plasminogen is a critical host  
919 pathogenicity factor for group A streptococcal infection. *Science*.  
920 2004;305(5688):1283-6.
- 921 36. Sun H, Wang X, Degen JL, and Ginsburg D. Reduced thrombin generation  
922 increases host susceptibility to group A streptococcal infection. *Blood*.  
923 2009;113(6):1358-64.
- 924 37. Kasper KJ, Zeppa JJ, Wakabayashi AT, Xu SX, Mazzuca DM, Welch I, Baroja ML,  
925 Kotb M, Cairns E, Cleary PP, et al. Bacterial superantigens promote acute  
926 nasopharyngeal infection by Streptococcus pyogenes in a human MHC Class  
927 II-dependent manner. *PLoS Pathog*. 2014;10(5):e1004155.

- 928 38. Sriskandan S, Unnikrishnan M, Krausz T, Dewchand H, Van Noorden S, Cohen  
929 J, and Altmann DM. Enhanced susceptibility to superantigen-associated  
930 streptococcal sepsis in human leukocyte antigen-DQ transgenic mice. *J Infect*  
931 *Dis.* 2001;184(2):166-73.
- 932 39. Marcum JA, and Kline DL. Species specificity of streptokinase. *Comp Biochem*  
933 *Physiol B.* 1983;75(3):389-94.
- 934 40. Wulf RJ, and Mertz ET. Studies on plasminogen. 8. Species specificity of  
935 streptokinase. *Can J Biochem.* 1969;47(10):927-31.
- 936 41. Langridge GC, Phan MD, Turner DJ, Perkins TT, Parts L, Haase J, Charles I,  
937 Maskell DJ, Peters SE, Dougan G, et al. Simultaneous assay of every  
938 *Salmonella Typhi* gene using one million transposon mutants. *Genome Res.*  
939 2009;19(12):2308-16.
- 940 42. van Opijnen T, and Camilli A. Transposon insertion sequencing: a new tool  
941 for systems-level analysis of microorganisms. *Nat Rev Microbiol.*  
942 2013;11(7):435-42.
- 943 43. Naseer U, Steinbakk M, Blystad H, and Caugant DA. Epidemiology of invasive  
944 group A streptococcal infections in Norway 2010-2014: A retrospective  
945 cohort study. *Eur J Clin Microbiol Infect Dis.* 2016;35(10):1639-48.
- 946 44. Smit PW, Lindholm L, Lyytikainen O, Jalava J, Patari-Sampo A, and Vuopio J.  
947 Epidemiology and emm types of invasive group A streptococcal infections in  
948 Finland, 2008-2013. *Eur J Clin Microbiol Infect Dis.* 2015;34(10):2131-6.
- 949 45. Meehan M, Murchan S, Gavin PJ, Drew RJ, and Cunney R. Epidemiology of an  
950 upsurge of invasive group A streptococcal infections in Ireland, 2012-2015. *J*  
951 *Infect.* 2018;77(3):183-90.
- 952 46. Smeesters PR, Laho D, Beall B, Steer AC, and Van Beneden CA. Seasonal,  
953 Geographic, and Temporal Trends of emm Clusters Associated With Invasive  
954 Group A Streptococcal Infections in US Multistate Surveillance. *Clin Infect Dis.*  
955 2017;64(5):694-5.
- 956 47. Sumbly P, Porcella SF, Madrigal AG, Barbian KD, Virtaneva K, Ricklefs SM,  
957 Sturdevant DE, Graham MR, Vuopio-Varkila J, Hoe NP, et al. Evolutionary  
958 origin and emergence of a highly successful clone of serotype M1 group A  
959 *Streptococcus* involved multiple horizontal gene transfer events. *J Infect Dis.*  
960 2005;192(5):771-82.
- 961 48. Kachroo et al. Integrated analysis of population genomics, transcriptomics  
962 and virulence provides novel insights into *Streptococcus pyogenes*  
963 pathogenesis. In review.
- 964 49. Charbonneau ARL, Forman OP, Cain AK, Newland G, Robinson C, Bournsnel M,  
965 Parkhill J, Leigh JA, Maskell DJ, and Waller AS. Defining the ABC of gene  
966 essentiality in streptococci. *BMC Genomics.* 2017;18(1):426.
- 967 50. Abel S, Abel zur Wiesch P, Davis BM, and Waldor MK. Analysis of Bottlenecks  
968 in Experimental Models of Infection. *PLoS Pathog.* 2015;11(6):e1004823.
- 969 51. Le Breton Y, Belew AT, Valdes KM, Islam E, Curry P, Tettelin H, Shirtliff ME,  
970 El-Sayed NM, and McIver KS. Essential Genes in the Core Genome of the  
971 Human Pathogen *Streptococcus pyogenes*. *Sci Rep.* 2015;5(9838).
- 972 52. Makthal N, Nguyen K, Do H, Gavagan M, Chandrangsu P, Helmann JD, Olsen  
973 RJ, and Kumaraswami M. A Critical Role of Zinc Importer AdcABC in Group A

- 974 Streptococcus-Host Interactions During Infection and Its Implications for  
975 Vaccine Development. *EBioMedicine*. 2017;21(131-41).
- 976 53. Sanson M, Makthal N, Flores AR, Olsen RJ, Musser JM, and Kumaraswami M.  
977 Adhesin competence repressor (AdcR) from *Streptococcus pyogenes* controls  
978 adaptive responses to zinc limitation and contributes to virulence. *Nucleic  
979 Acids Res*. 2015;43(1):418-32.
- 980 54. van Sorge NM, Cole JN, Kuipers K, Henningham A, Aziz RK, Kasirer-Friede A,  
981 Lin L, Berends ETM, Davies MR, Dougan G, et al. The classical lancefield  
982 antigen of group A *Streptococcus* is a virulence determinant with  
983 implications for vaccine design. *Cell Host Microbe*. 2014;15(6):729-40.
- 984 55. Henningham A, Davies MR, Uchiyama S, van Sorge NM, Lund S, Chen KT,  
985 Walker MJ, Cole JN, and Nizet V. Virulence Role of the GlcNAc Side Chain of  
986 the Lancefield Cell Wall Carbohydrate Antigen in Non-M1-Serotype Group A  
987 *Streptococcus*. *MBio*. 2018;9(1).
- 988 56. Honda-Ogawa M, Sumitomo T, Mori Y, Hamd DT, Ogawa T, Yamaguchi M,  
989 Nakata M, and Kawabata S. *Streptococcus pyogenes* Endopeptidase O  
990 Contributes to Evasion from Complement-mediated Bacteriolysis via Binding  
991 to Human Complement Factor C1q. *J Biol Chem*. 2017;292(10):4244-54.
- 992 57. Brouwer S, Cork AJ, Ong CY, Barnett TC, West NP, McIver KS, and Walker MJ.  
993 Endopeptidase PepO Regulates the SpeB Cysteine Protease and Is Essential  
994 for the Virulence of Invasive M1T1 *Streptococcus pyogenes*. *J Bacteriol*.  
995 2018;200(8).
- 996 58. Reid SD, Montgomery AG, Voyich JM, DeLeo FR, Lei B, Ireland RM, Green NM,  
997 Liu M, Lukomski S, and Musser JM. Characterization of an extracellular  
998 virulence factor made by group A *Streptococcus* with homology to the  
999 *Listeria monocytogenes* internalin family of proteins. *Infect Immun*.  
1000 2003;71(12):7043-52.
- 1001 59. Brenot A, King KY, and Caparon MG. The PerR regulon in peroxide resistance  
1002 and virulence of *Streptococcus pyogenes*. *Mol Microbiol*. 2005;55(1):221-34.
- 1003 60. Trevino J, Liu Z, Cao TN, Ramirez-Pena E, and Sumbly P. RivR is a negative  
1004 regulator of virulence factor expression in group A *Streptococcus*. *Infect  
1005 Immun*. 2013;81(1):364-72.
- 1006 61. Lynskey NN, Goulding D, Gierula M, Turner CE, Dougan G, Edwards RJ, and  
1007 Sriskandan S. RocA truncation underpins hyper-encapsulation, carriage  
1008 longevity and transmissibility of serotype M18 group A streptococci. *PLoS  
1009 Pathog*. 2013;9(12):e1003842.
- 1010 62. Jain I, Miller EW, Danger JL, Pflughoeft KJ, and Sumbly P. RocA Is an Accessory  
1011 Protein to the Virulence-Regulating CovRS Two-Component System in Group  
1012 A *Streptococcus*. *Infect Immun*. 2017;85(11).
- 1013 63. Biswas I, and Scott JR. Identification of rocA, a positive regulator of covR  
1014 expression in the group A streptococcus. *J Bacteriol*. 2003;185(10):3081-90.
- 1015 64. Miller EW, Danger JL, Ramalinga AB, Horstmann N, Shelburne SA, and Sumbly  
1016 P. Regulatory rewiring confers serotype-specific hyper-virulence in the  
1017 human pathogen group A *Streptococcus*. *Mol Microbiol*. 2015;98(3):473-89.
- 1018 65. Zhu L, Olsen RJ, Horstmann N, Shelburne SA, Fan J, Hu Y, and Musser JM.  
1019 Intergenic Variable-Number Tandem-Repeat Polymorphism Upstream of

- 1020           rocA Alters Toxin Production and Enhances Virulence in Streptococcus  
1021           pyogenes. *Infect Immun.* 2016;84(7):2086-93.
- 1022   66.   Bernard PE, Kachroo P, Zhu L, Beres SB, Eraso JM, Kajani Z, Long SW, Musser  
1023           JM, and Olsen RJ. RocA has serotype-specific gene regulatory and  
1024           pathogenesis activity in serotype M28 group A streptococcus. *Infect Immun.*  
1025           2018.
- 1026   67.   Basavanna S, Chimalapati S, Maqbool A, Rubbo B, Yuste J, Wilson RJ, Hosie A,  
1027           Ogunniyi AD, Paton JC, Thomas G, et al. The effects of methionine acquisition  
1028           and synthesis on Streptococcus pneumoniae growth and virulence. *PLoS One.*  
1029           2013;8(1):e49638.
- 1030   68.   Davies HC, Karush F, and Rudd JH. Effect of Amino Acids on Steady-State  
1031           Growth of a Group a Hemolytic Streptococcus. *J Bacteriol.* 1965;89(4):21-7.
- 1032   69.   Pancholi V, and Caparon M. In: Ferretti JJ, Stevens DL, and Fischetti VA eds.  
1033           *Streptococcus pyogenes : Basic Biology to Clinical Manifestations.* Oklahoma  
1034           City (OK); 2016.
- 1035   70.   Rodriguez-Ortega MJ, Norais N, Bensi G, Liberatori S, Capo S, Mora M,  
1036           Scarselli M, Doro F, Ferrari G, Garaguso I, et al. Characterization and  
1037           identification of vaccine candidate proteins through analysis of the group A  
1038           Streptococcus surface proteome. *Nat Biotechnol.* 2006;24(2):191-7.
- 1039   71.   Chang JC, and Federle MJ. PptAB Exports Rgg Quorum-Sensing Peptides in  
1040           Streptococcus. *PLoS One.* 2016;11(12):e0168461.
- 1041   72.   Alonso-Casajus N, Dauvillee D, Viale AM, Munoz FJ, Baroja-Fernandez E,  
1042           Moran-Zorzano MT, Eydallin G, Ball S, and Pozueta-Romero J. Glycogen  
1043           phosphorylase, the product of the glgP Gene, catalyzes glycogen breakdown  
1044           by removing glucose units from the nonreducing ends in Escherichia coli. *J*  
1045           *Bacteriol.* 2006;188(14):5266-72.
- 1046   73.   Chimalapati S, Cohen JM, Camberlein E, MacDonald N, Durmort C, Vernet T,  
1047           Hermans PW, Mitchell T, and Brown JS. Effects of deletion of the  
1048           Streptococcus pneumoniae lipoprotein diacylglyceryl transferase gene lgt on  
1049           ABC transporter function and on growth in vivo. *PLoS One.*  
1050           2012;7(7):e41393.
- 1051   74.   Das S, Kanamoto T, Ge X, Xu P, Unoki T, Munro CL, and Kitten T. Contribution  
1052           of lipoproteins and lipoprotein processing to endocarditis virulence in  
1053           Streptococcus sanguinis. *J Bacteriol.* 2009;191(13):4166-79.
- 1054   75.   Weston BF, Brenot A, and Caparon MG. The metal homeostasis protein, Lsp,  
1055           of Streptococcus pyogenes is necessary for acquisition of zinc and virulence.  
1056           *Infect Immun.* 2009;77(7):2840-8.
- 1057   76.   Voyich JM, Braughton KR, Sturdevant DE, Vuong C, Kobayashi SD, Porcella SF,  
1058           Otto M, Musser JM, and DeLeo FR. Engagement of the pathogen survival  
1059           response used by group A Streptococcus to avert destruction by innate host  
1060           defense. *J Immunol.* 2004;173(2):1194-201.
- 1061   77.   Voyich JM, Sturdevant DE, Braughton KR, Kobayashi SD, Lei B, Virtaneva K,  
1062           Dorward DW, Musser JM, and DeLeo FR. Genome-wide protective response  
1063           used by group A Streptococcus to evade destruction by human  
1064           polymorphonuclear leukocytes. *Proc Natl Acad Sci U S A.* 2003;100(4):1996-  
1065           2001.

- 1066 78. Bergstrom J, Furst P, Noree LO, and Vinnars E. Intracellular free amino acid  
1067 concentration in human muscle tissue. *J Appl Physiol.* 1974;36(6):693-7.
- 1068 79. Chang JC, LaSarre B, Jimenez JC, Aggarwal C, and Federle MJ. Two group A  
1069 streptococcal peptide pheromones act through opposing Rgg regulators to  
1070 control biofilm development. *PLoS Pathog.* 2011;7(8):e1002190.
- 1071 80. Graham MR, Virtaneva K, Porcella SF, Barry WT, Gowen BB, Johnson CR,  
1072 Wright FA, and Musser JM. Group A Streptococcus transcriptome dynamics  
1073 during growth in human blood reveals bacterial adaptive and survival  
1074 strategies. *Am J Pathol.* 2005;166(2):455-65.
- 1075 81. Herten E, Johansson L, Kansal R, Hecht A, Dahesh S, Janos M, Nizet V, Kotb M,  
1076 and Norrby-Teglund A. Intracellular Streptococcus pyogenes in human  
1077 macrophages display an altered gene expression profile. *PLoS One.*  
1078 2012;7(4):e35218.
- 1079 82. Graham MR, Smoot LM, Migliaccio CA, Virtaneva K, Sturdevant DE, Porcella  
1080 SF, Federle MJ, Adams GJ, Scott JR, and Musser JM. Virulence control in group  
1081 A Streptococcus by a two-component gene regulatory system: global  
1082 expression profiling and in vivo infection modeling. *Proc Natl Acad Sci U S A.*  
1083 2002;99(21):13855-60.
- 1084 83. Barquist L, Mayho M, Cummins C, Cain AK, Boinett CJ, Page AJ, Langridge GC,  
1085 Quail MA, Keane JA, and Parkhill J. The TraDIS toolkit: sequencing and  
1086 analysis for dense transposon mutant libraries. *Bioinformatics.*  
1087 2016;32(7):1109-11.  
1088
